# Supplementary figures and images for: Synthesis of ferrocene tethered open and macrocyclic bis-β-lactams and bis-β-amino acid derivatives
Source: Royal Society of Chemistry journal article supplement (doi:10.1039/b911450e), 2009-01-01

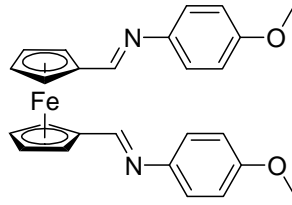

**1a**

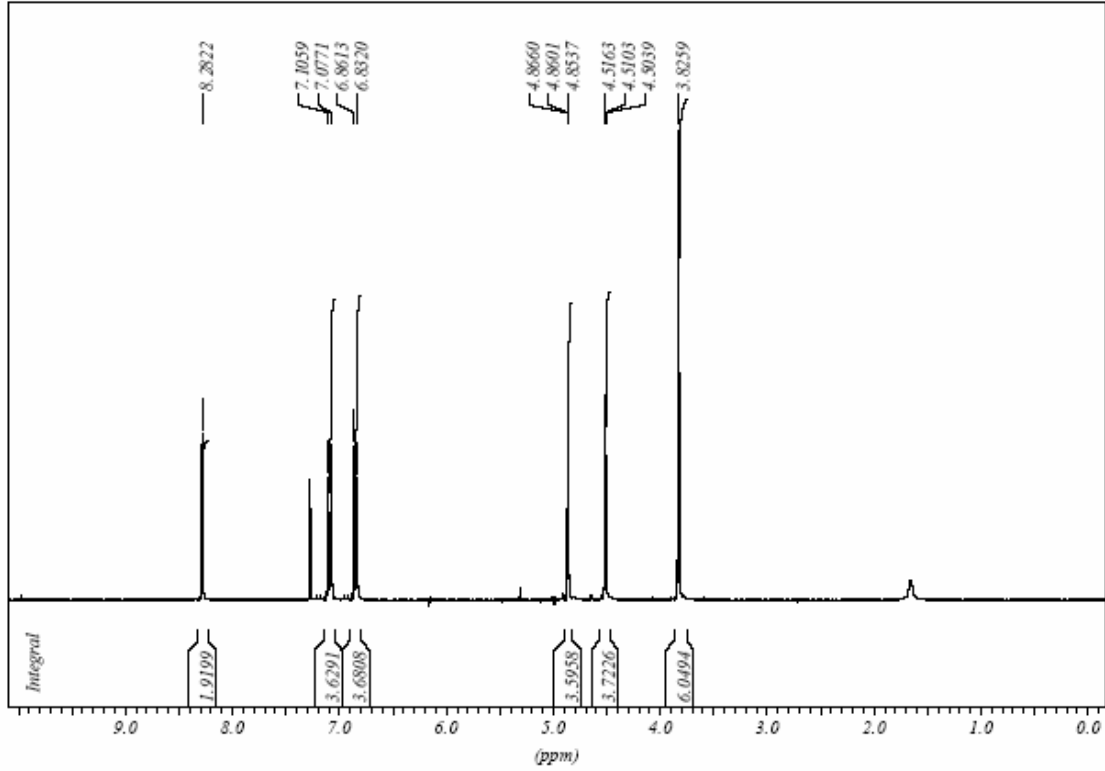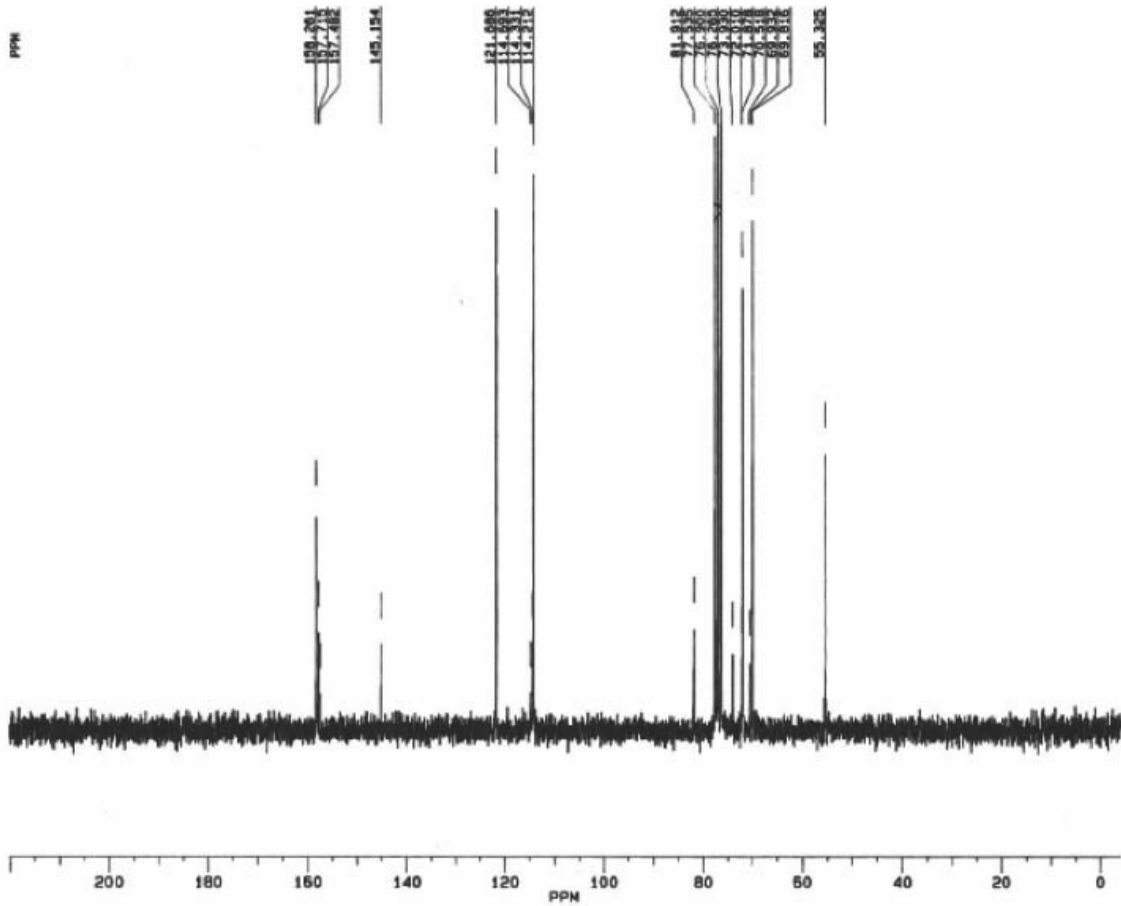

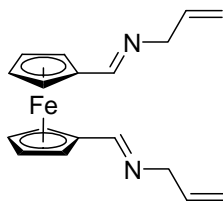

1b

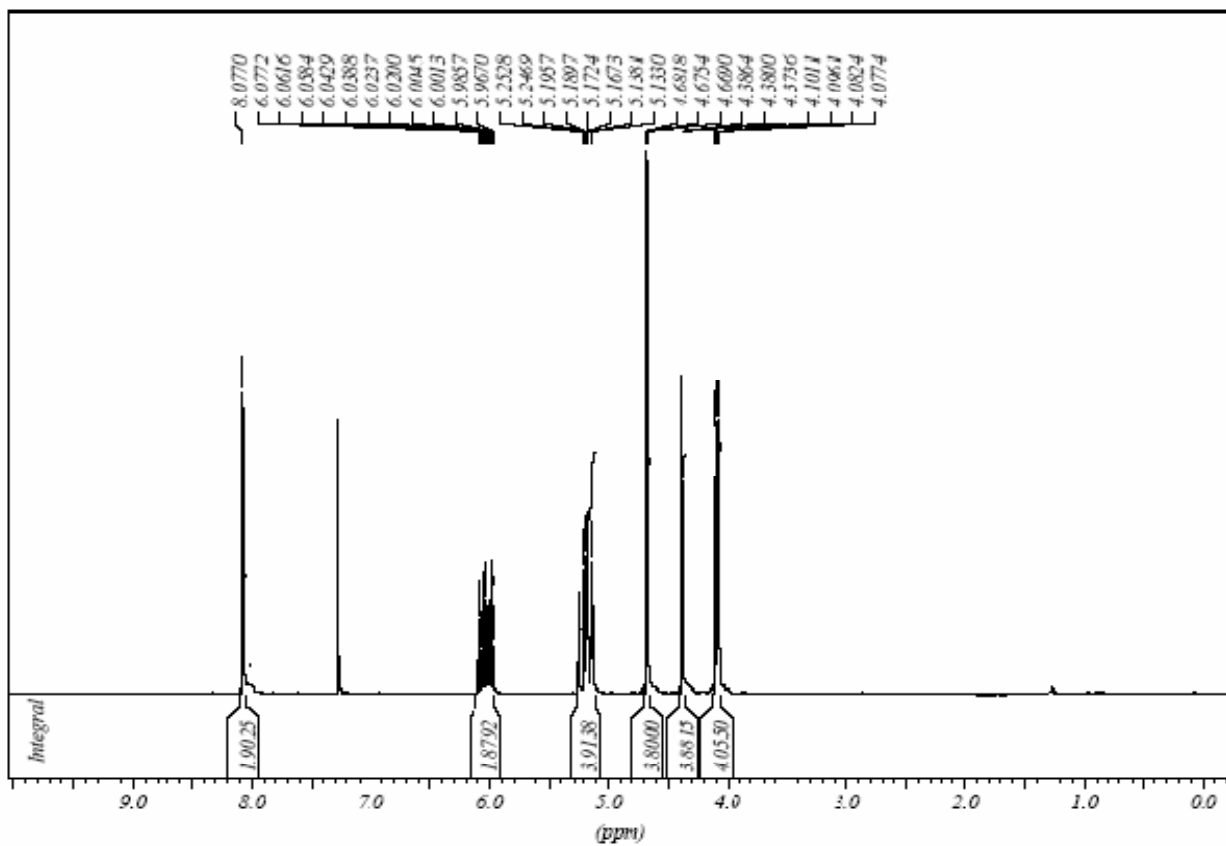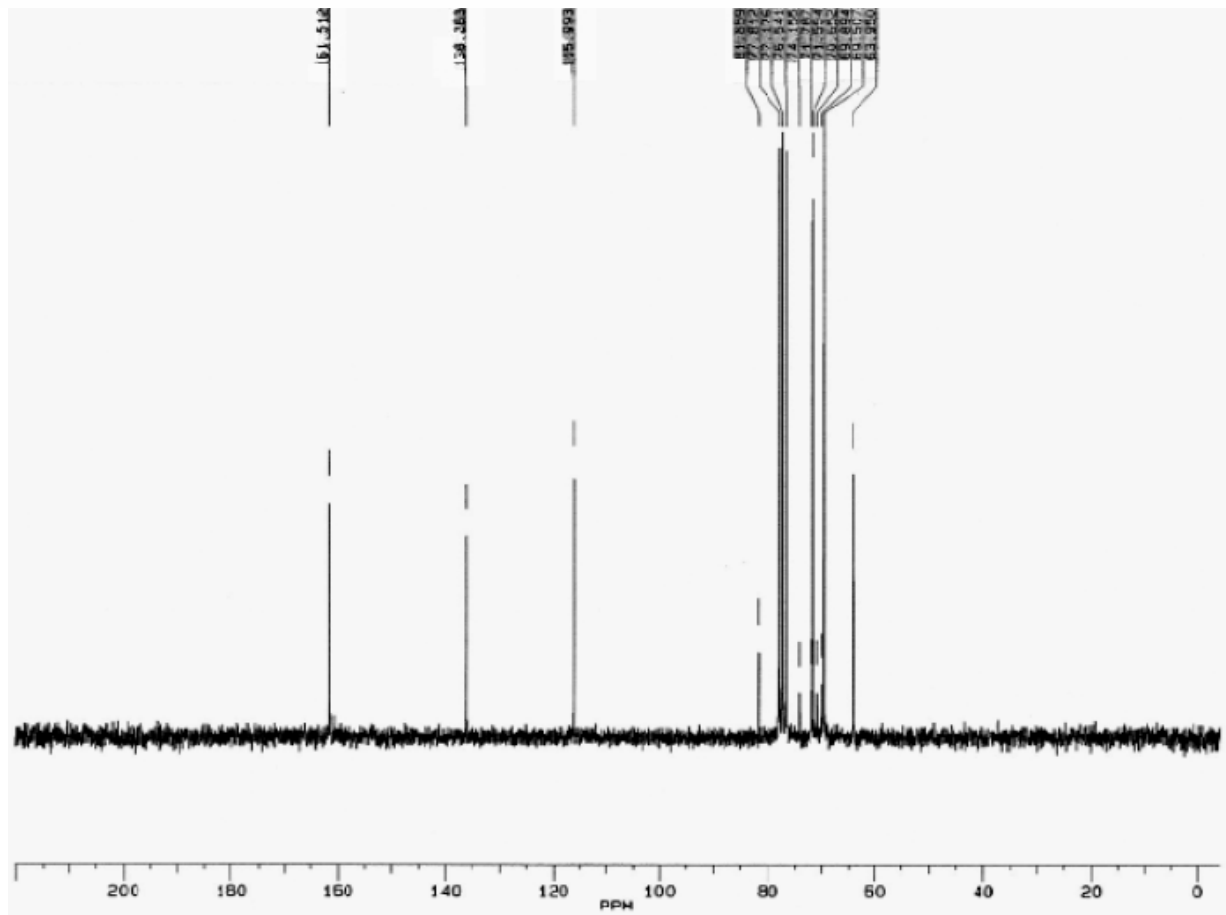







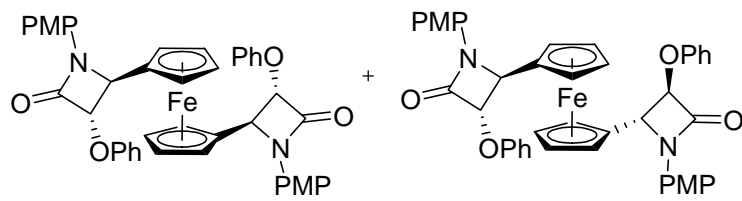

2b

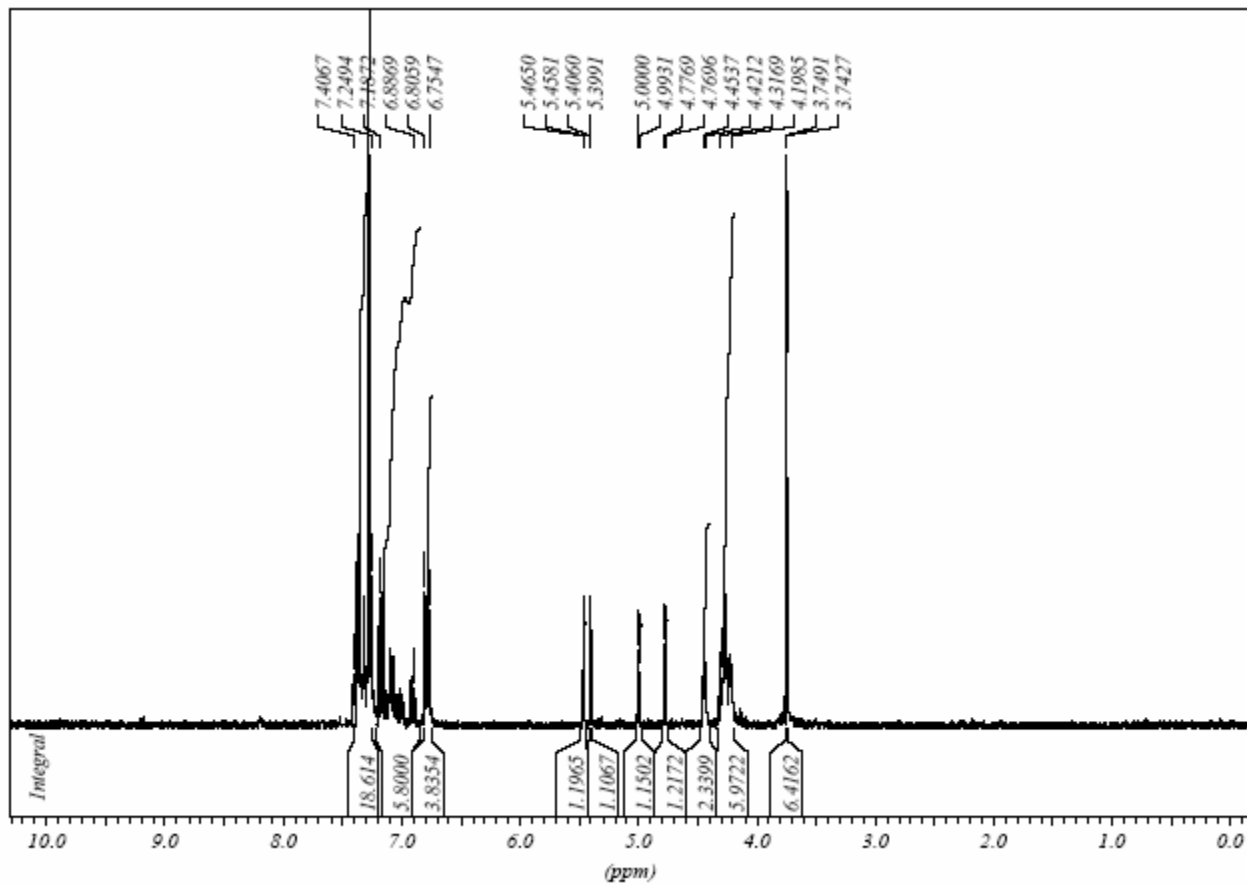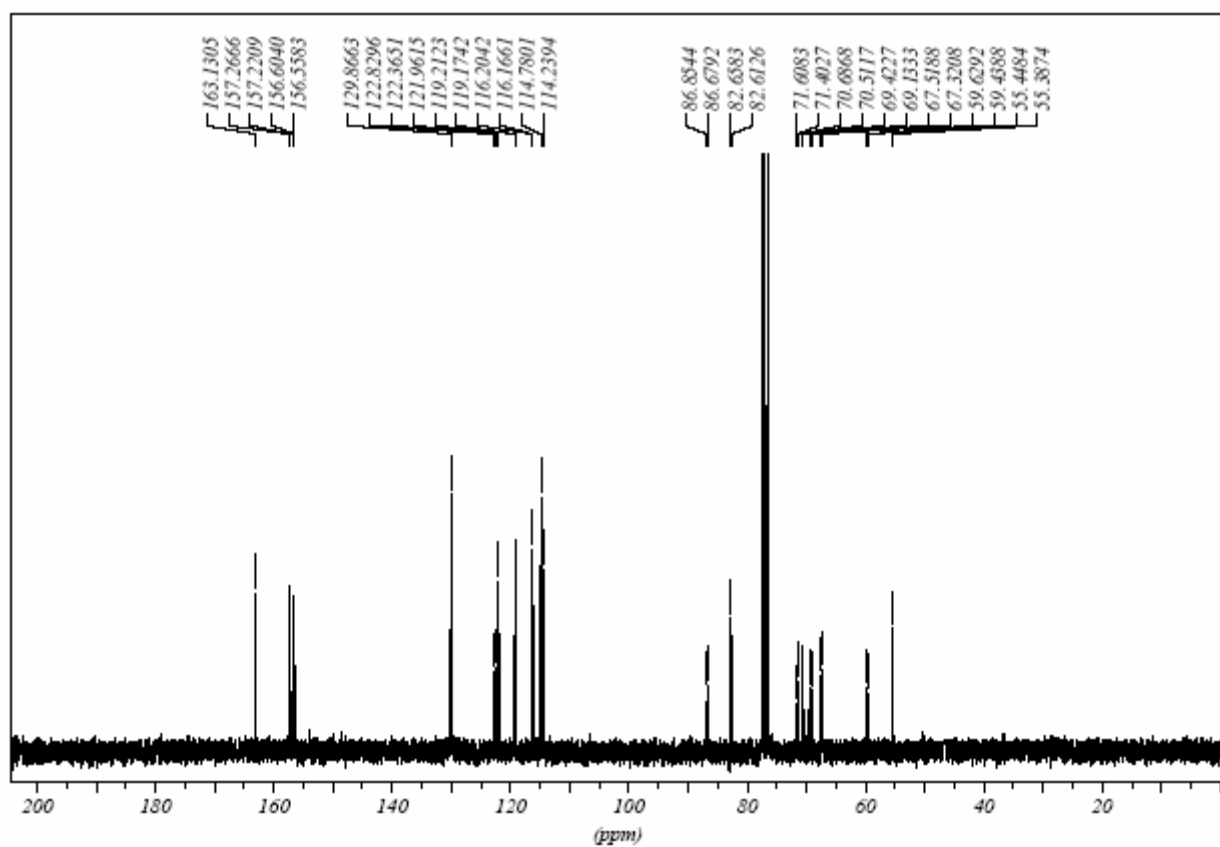

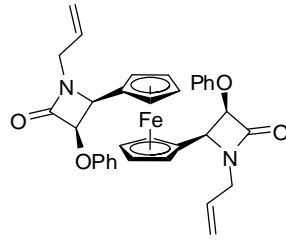

**syn-2c**

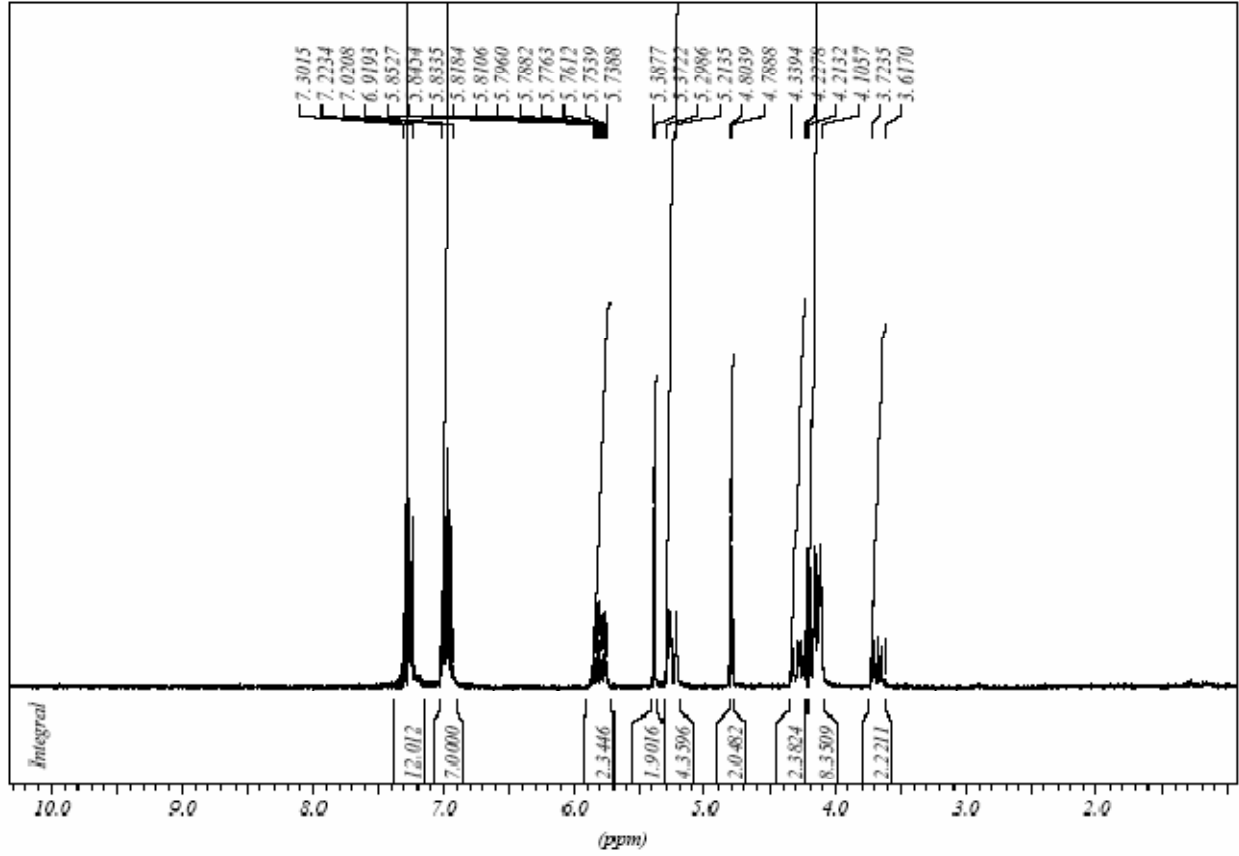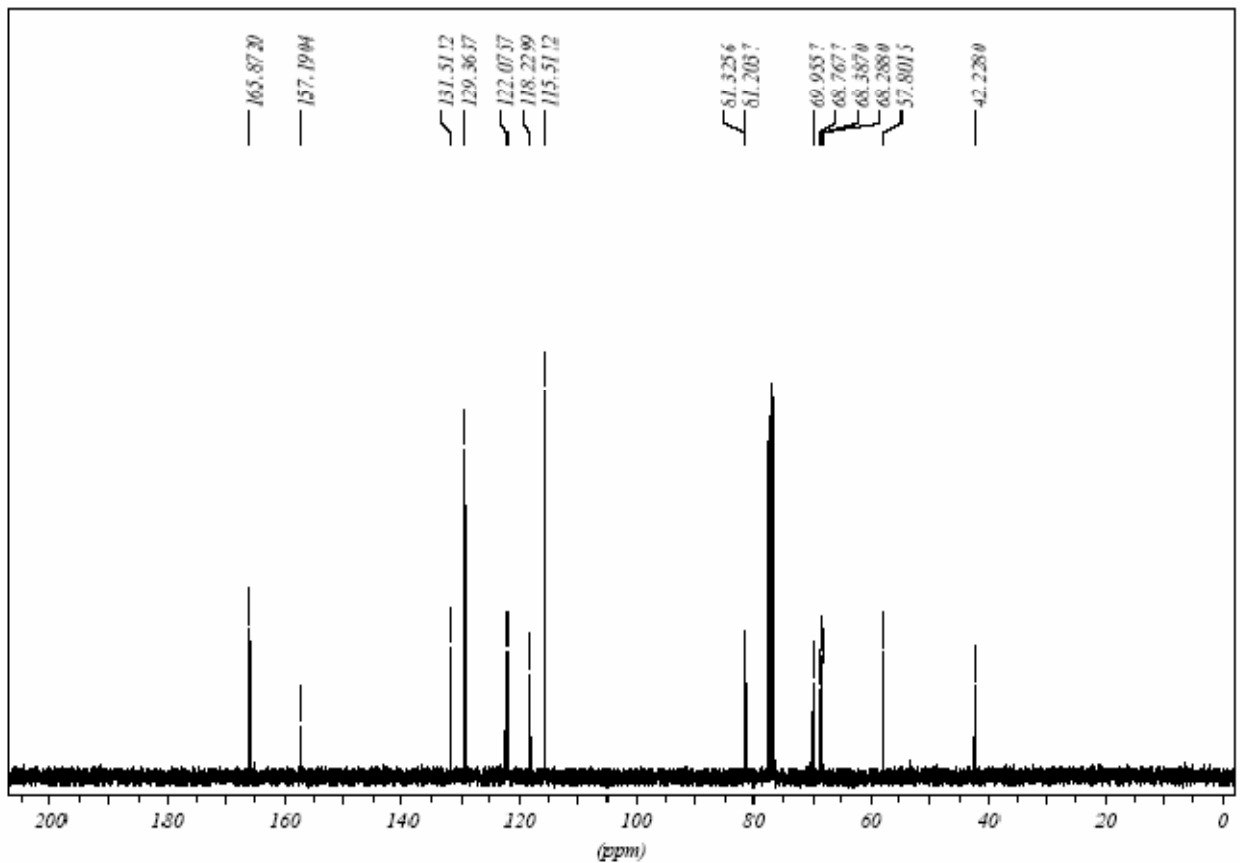

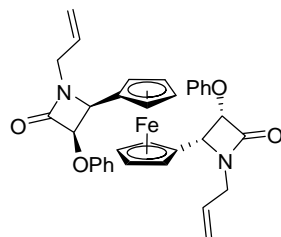

*anti*-2c

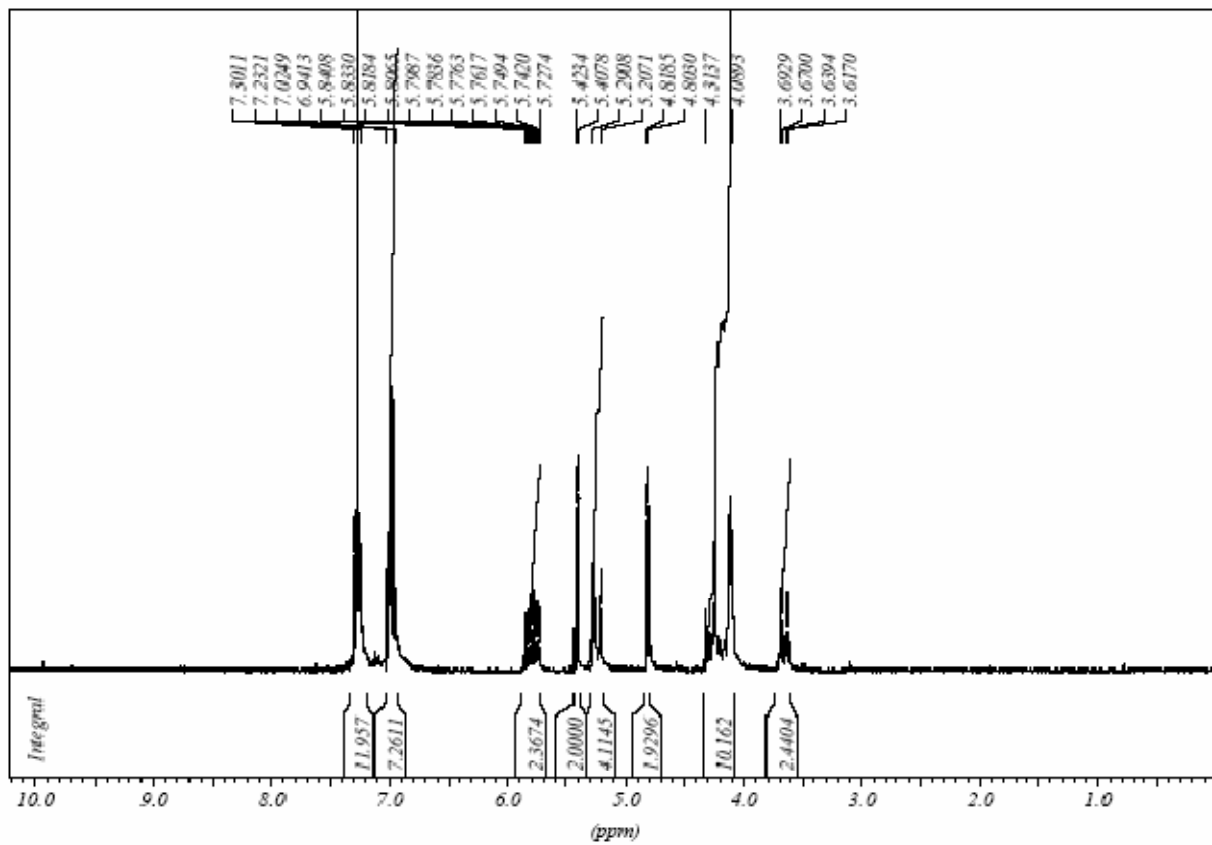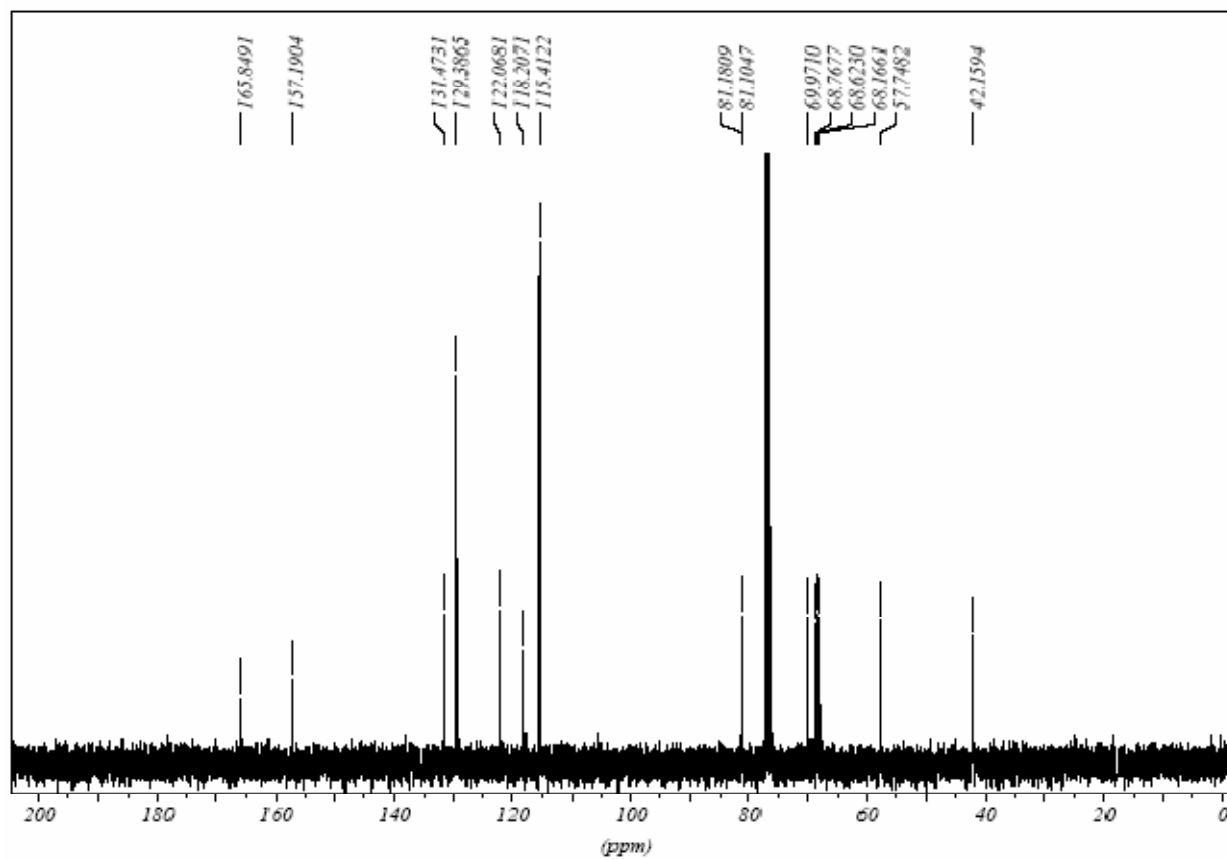

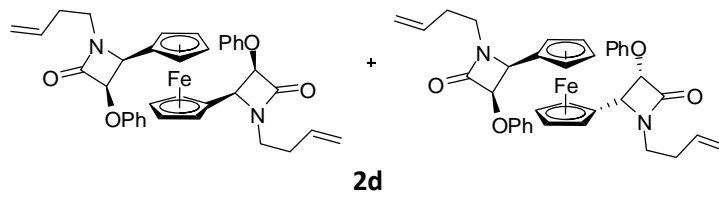

**2d**

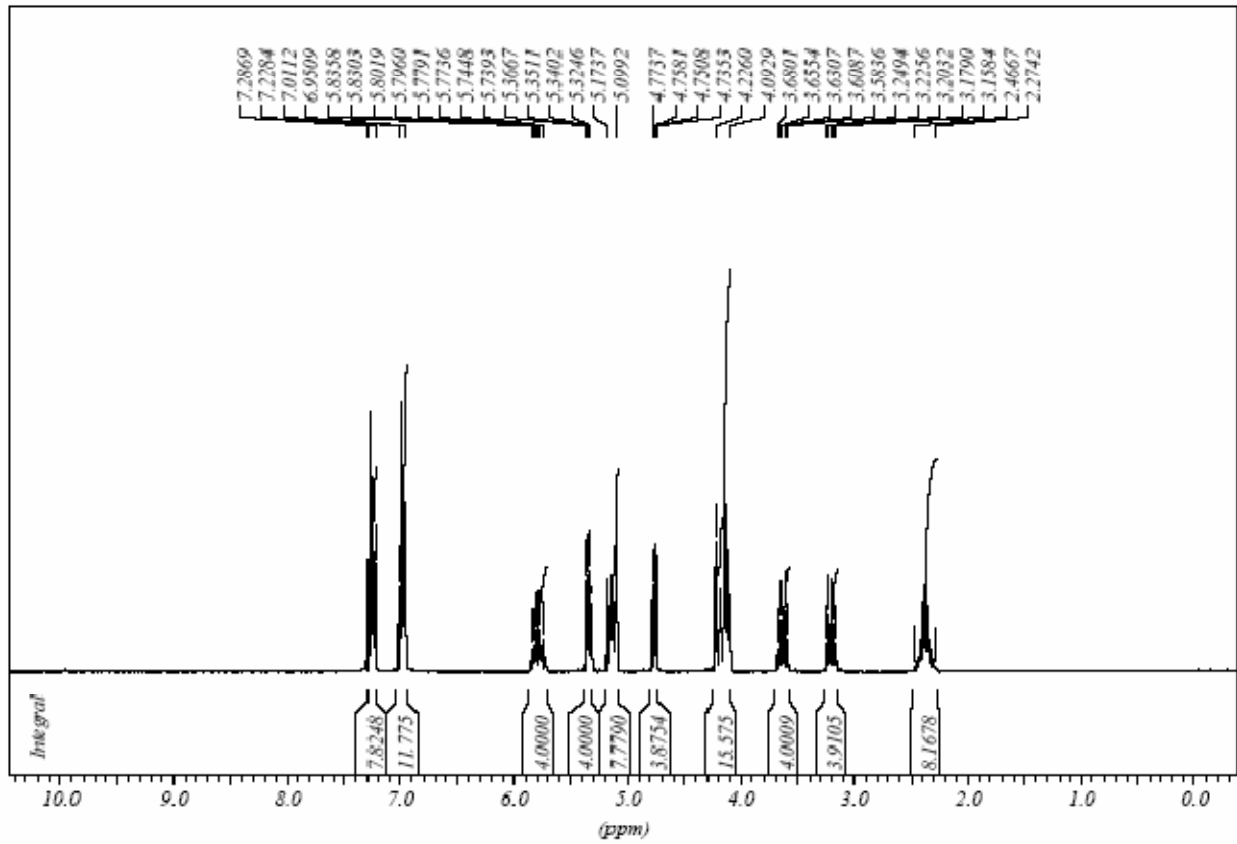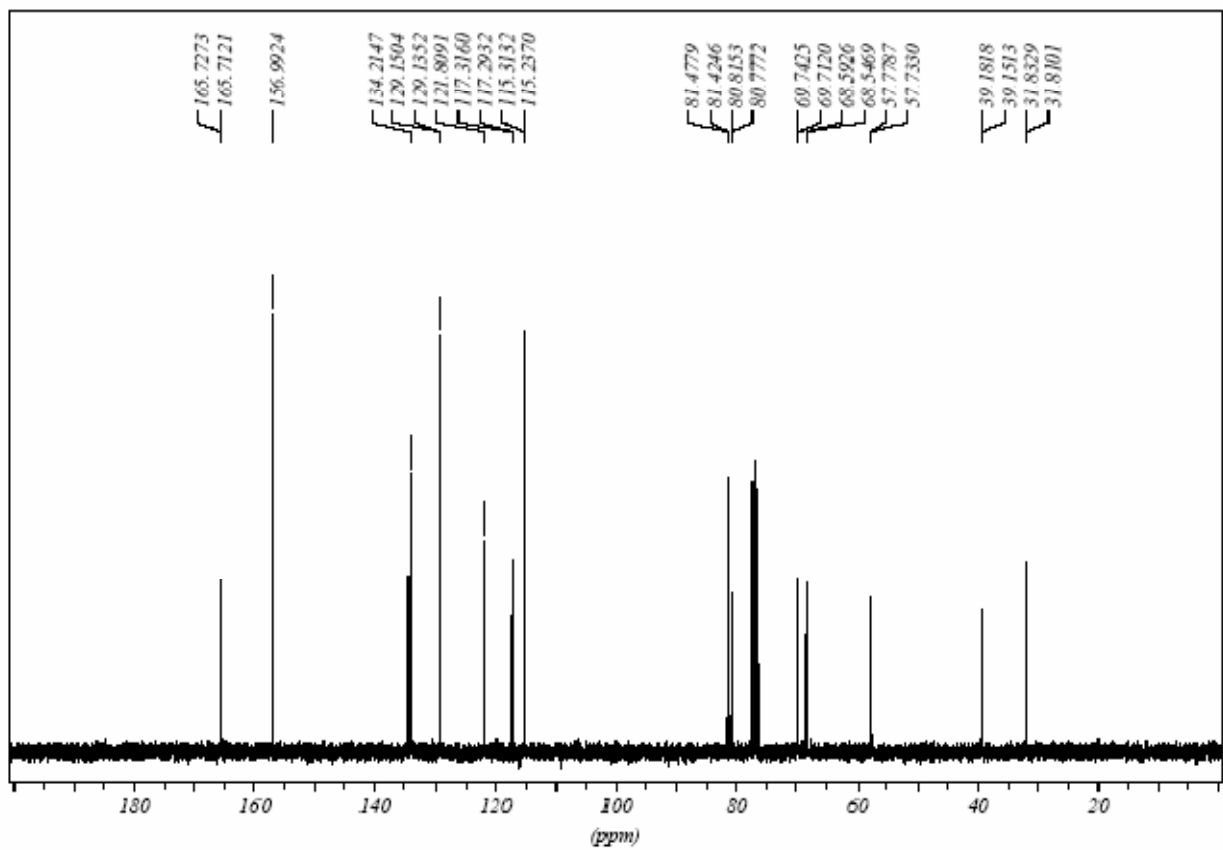

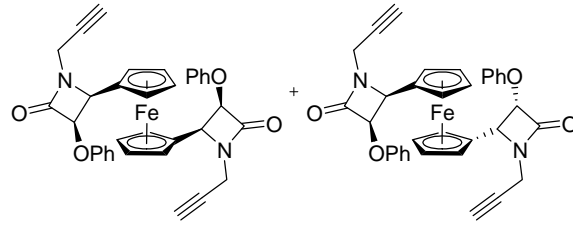

2e

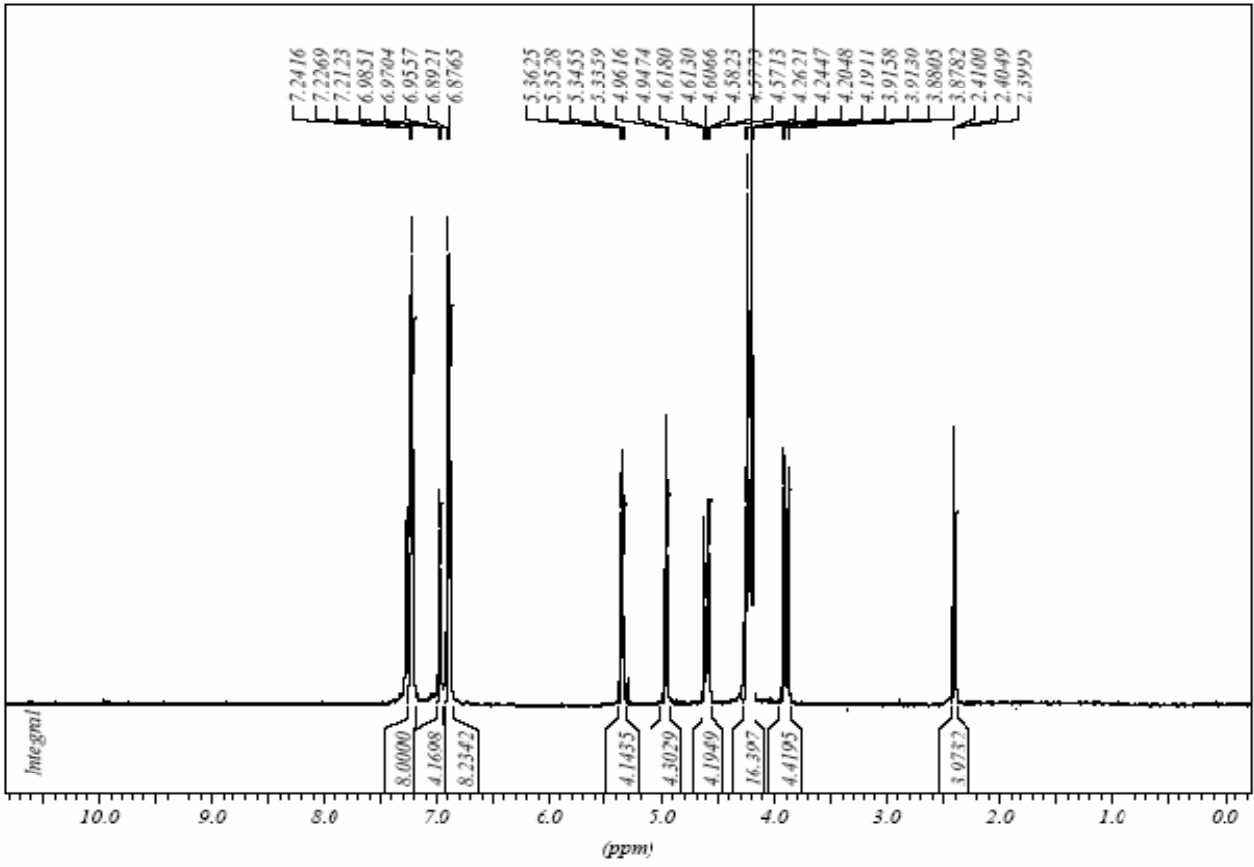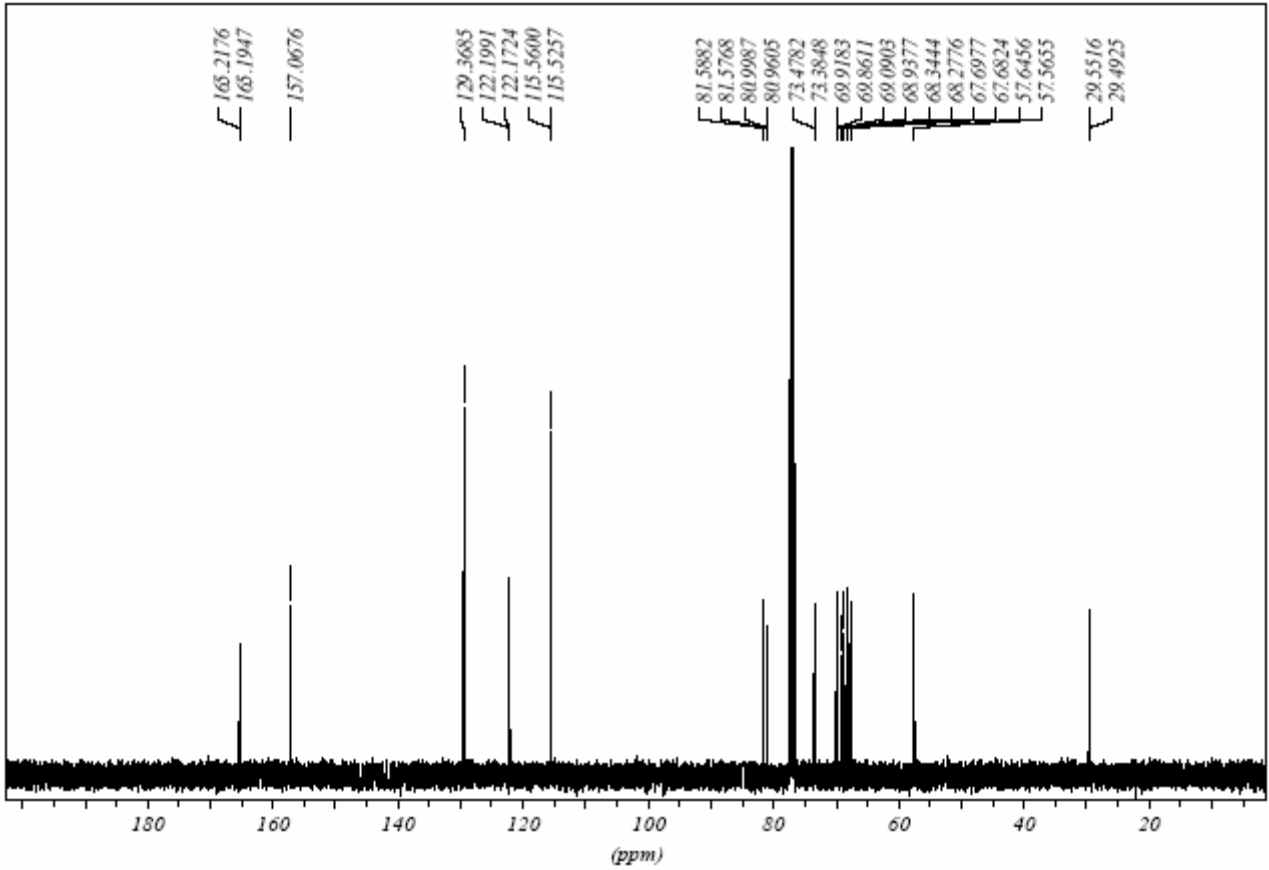



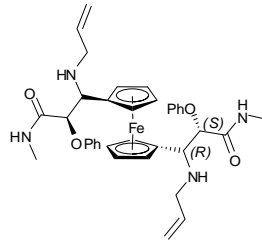

**3b**

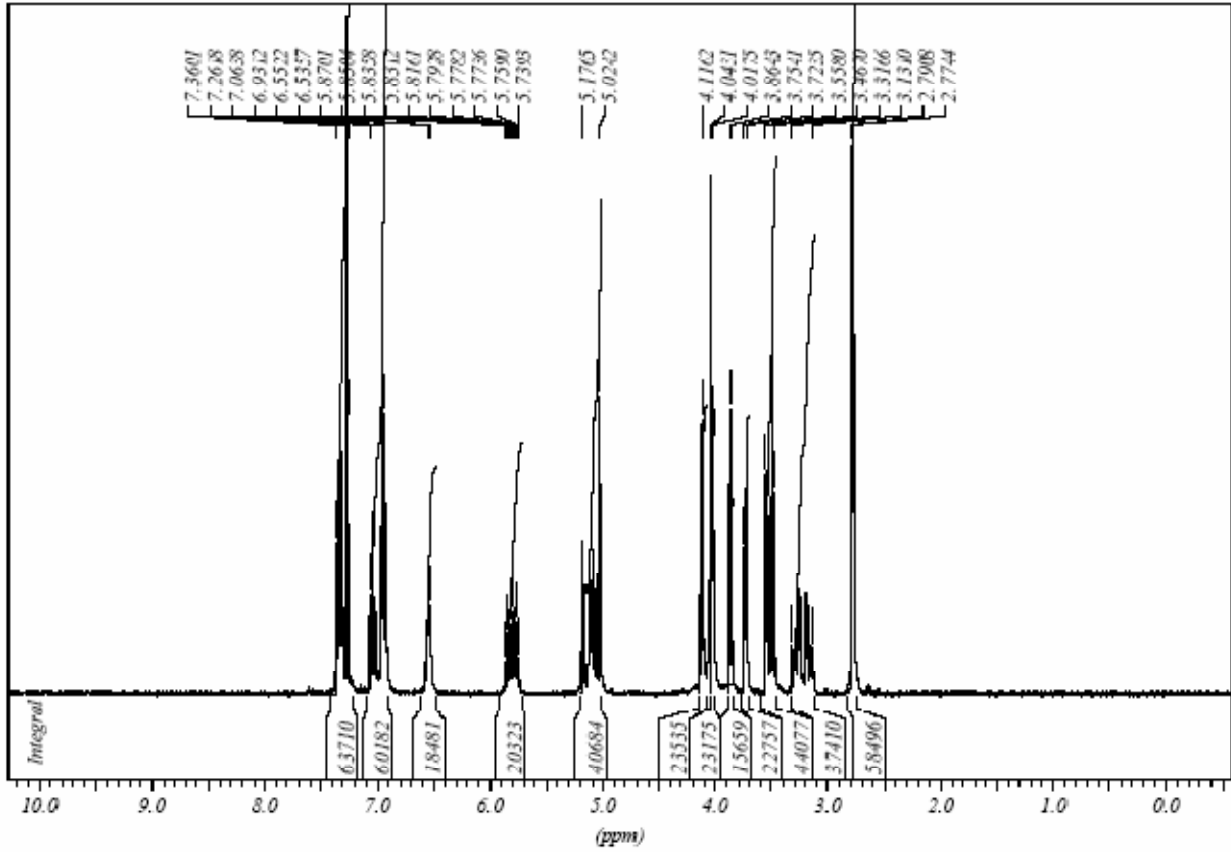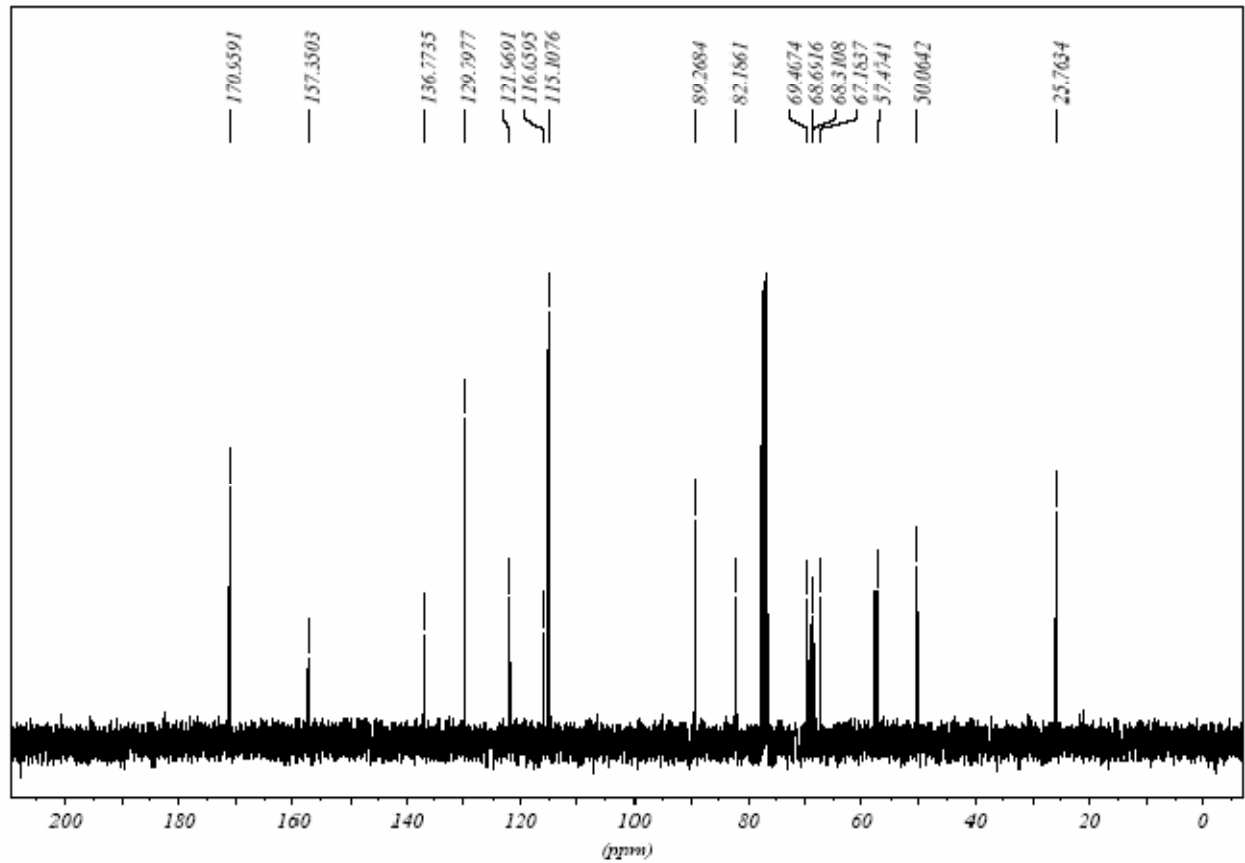

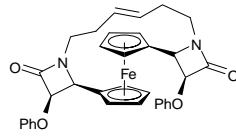

*syn-E-4*

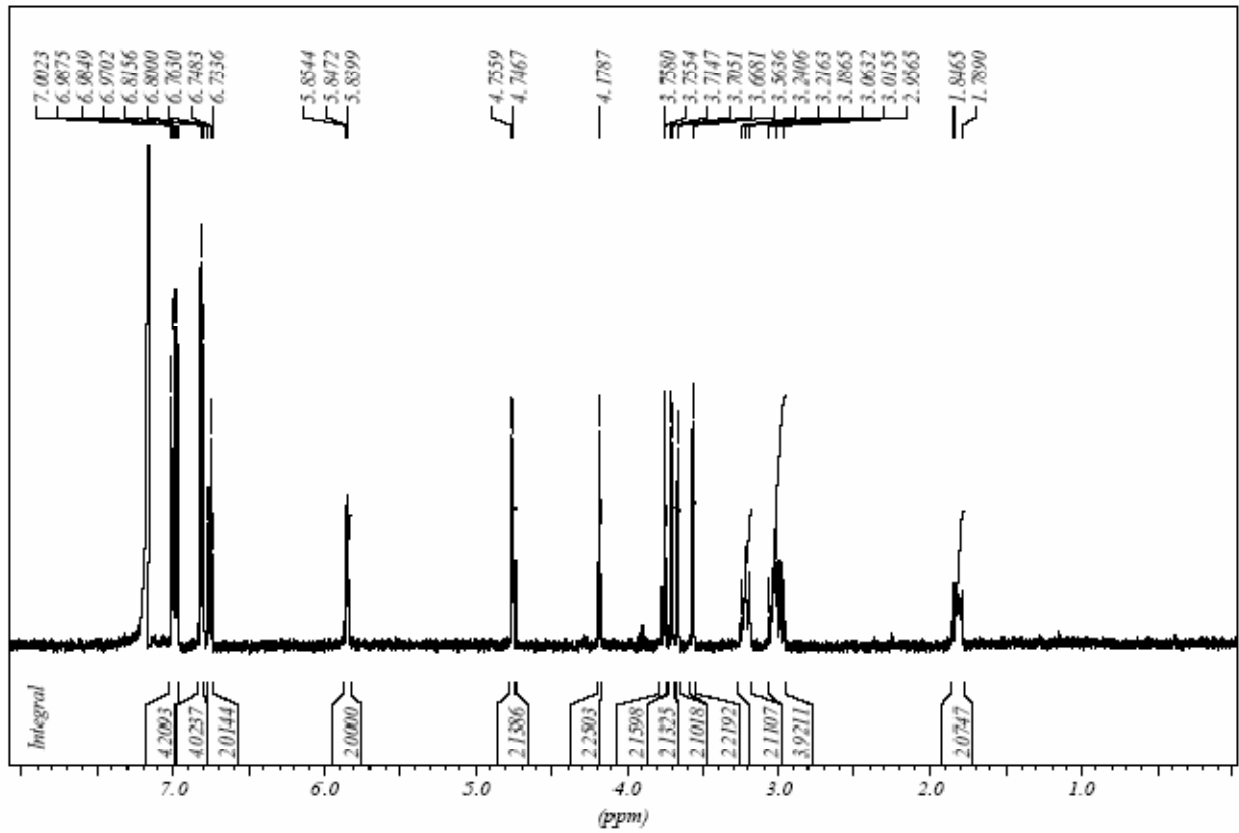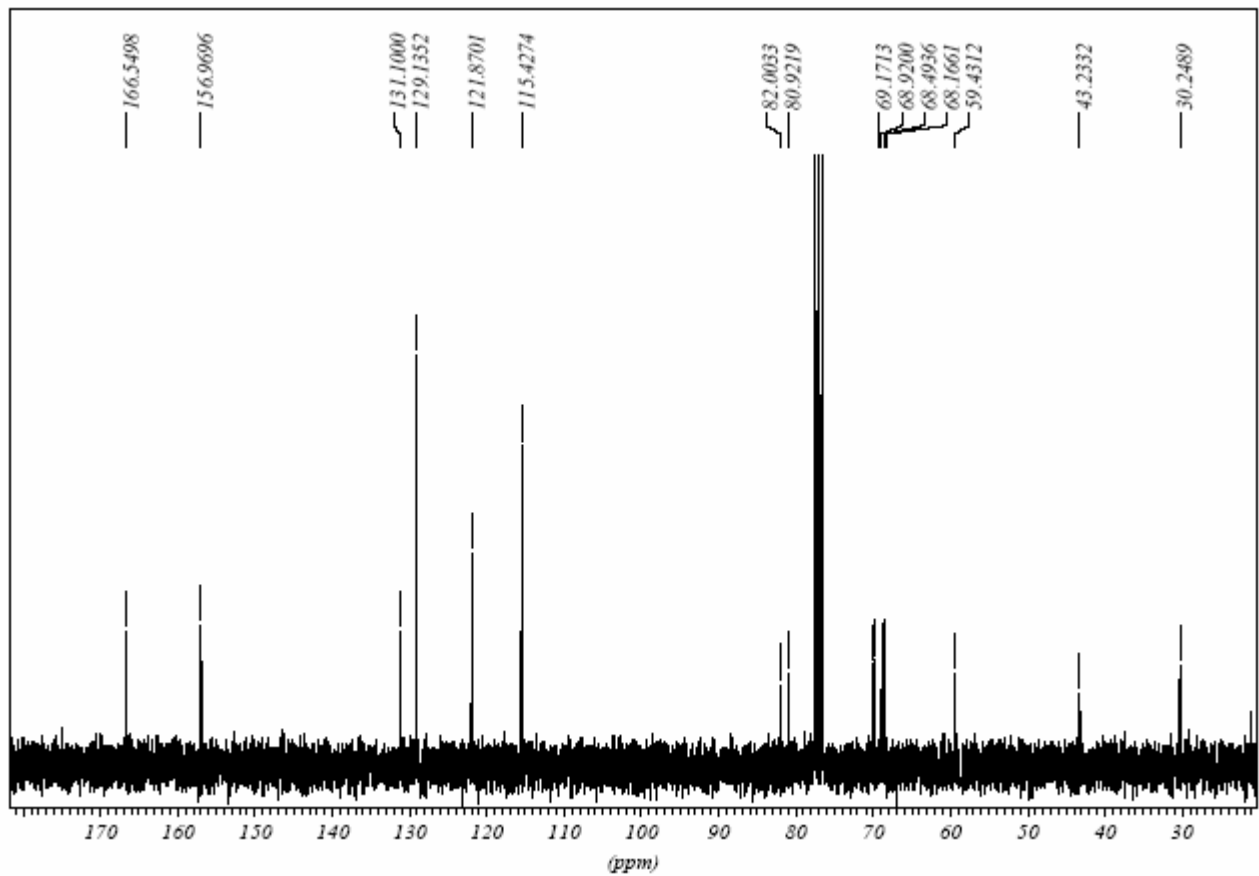

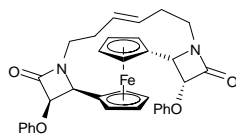

**anti-E-4**

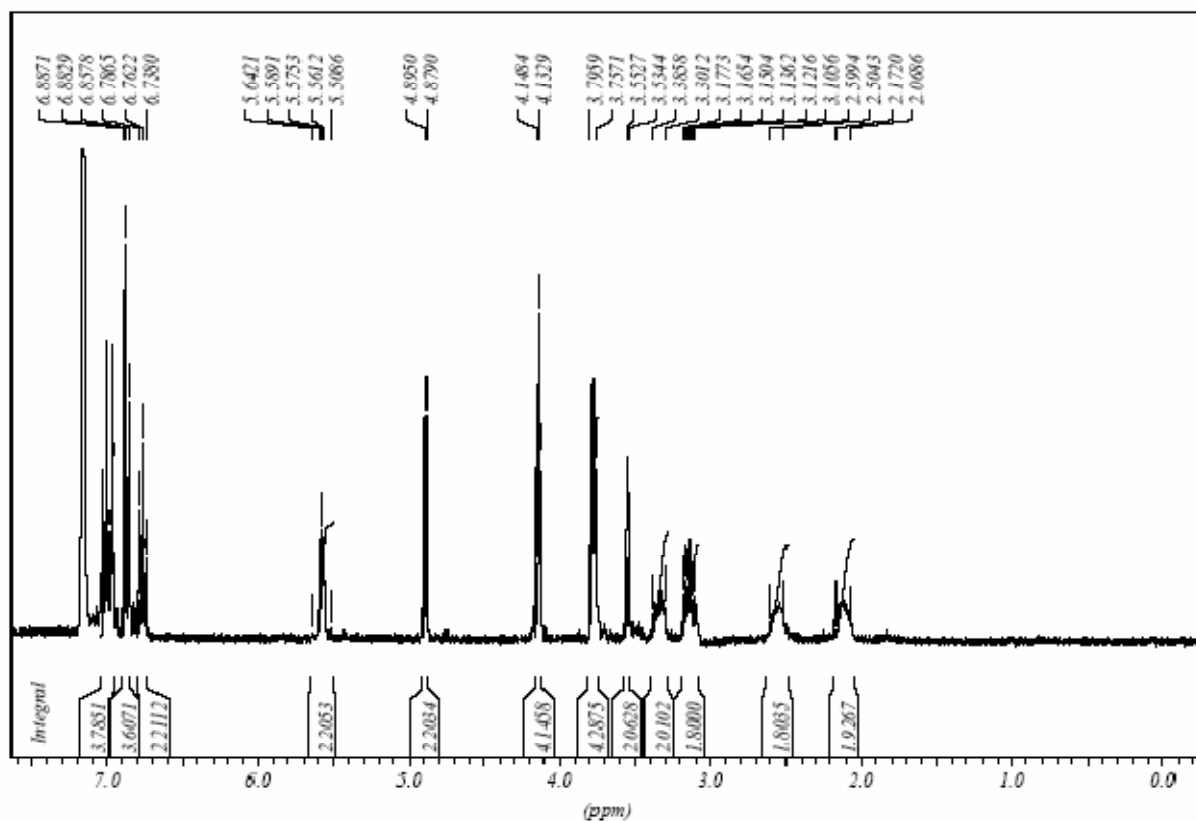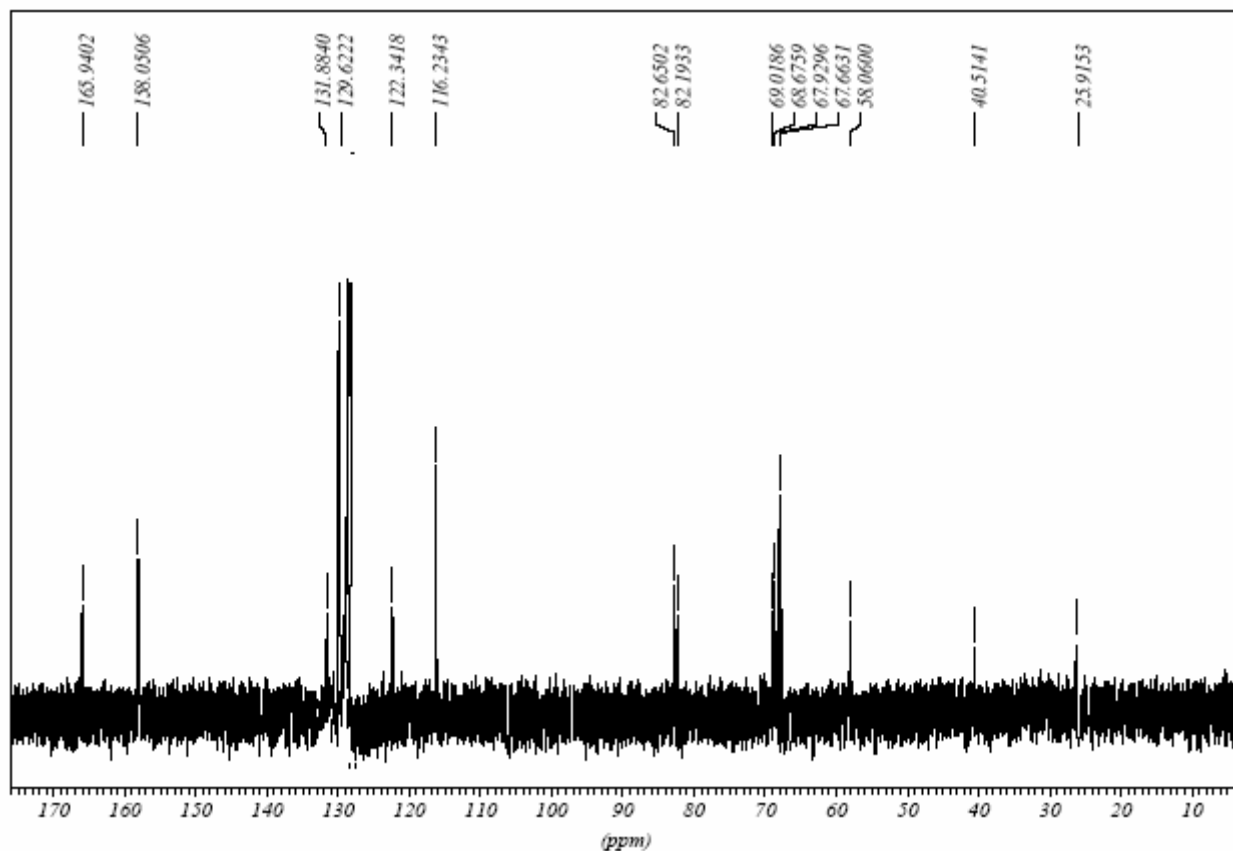

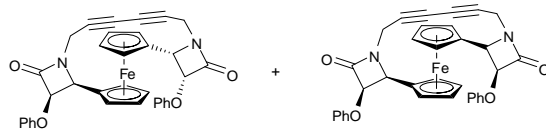

5

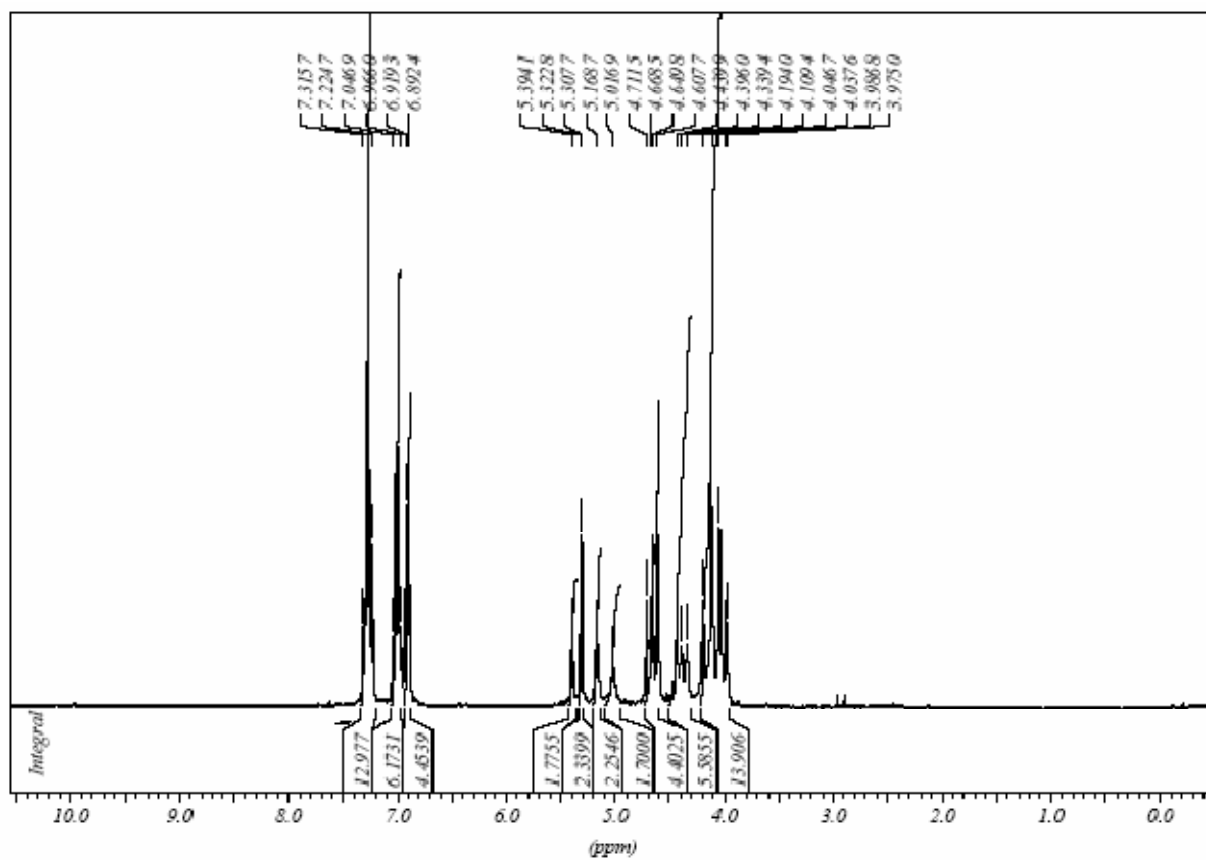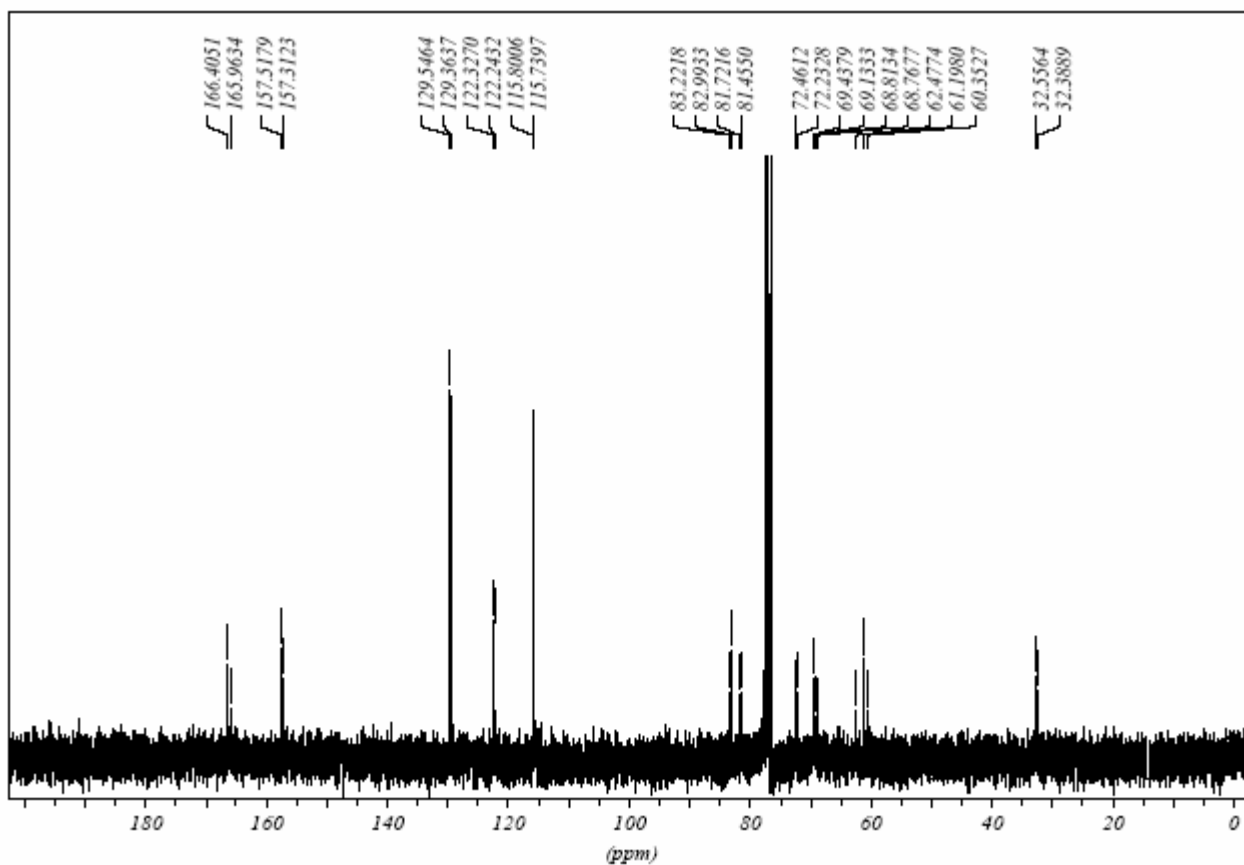

Supplement: b911450e.pdf [file b911450e.pdf]



**1a**

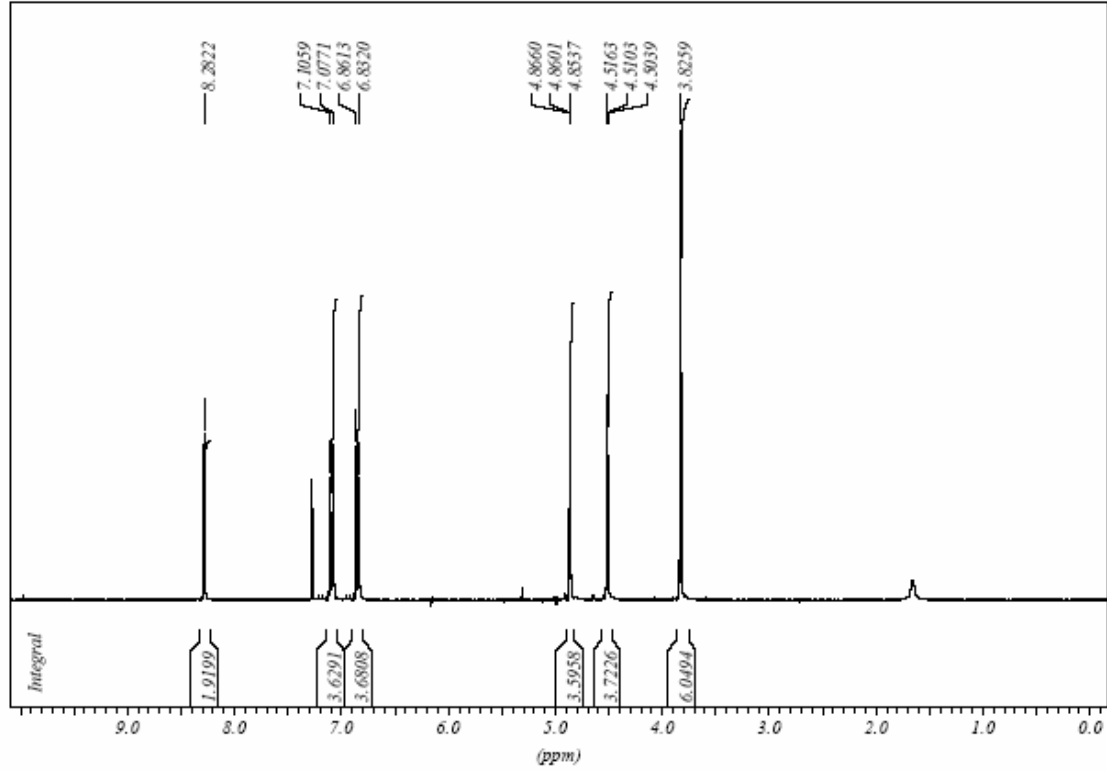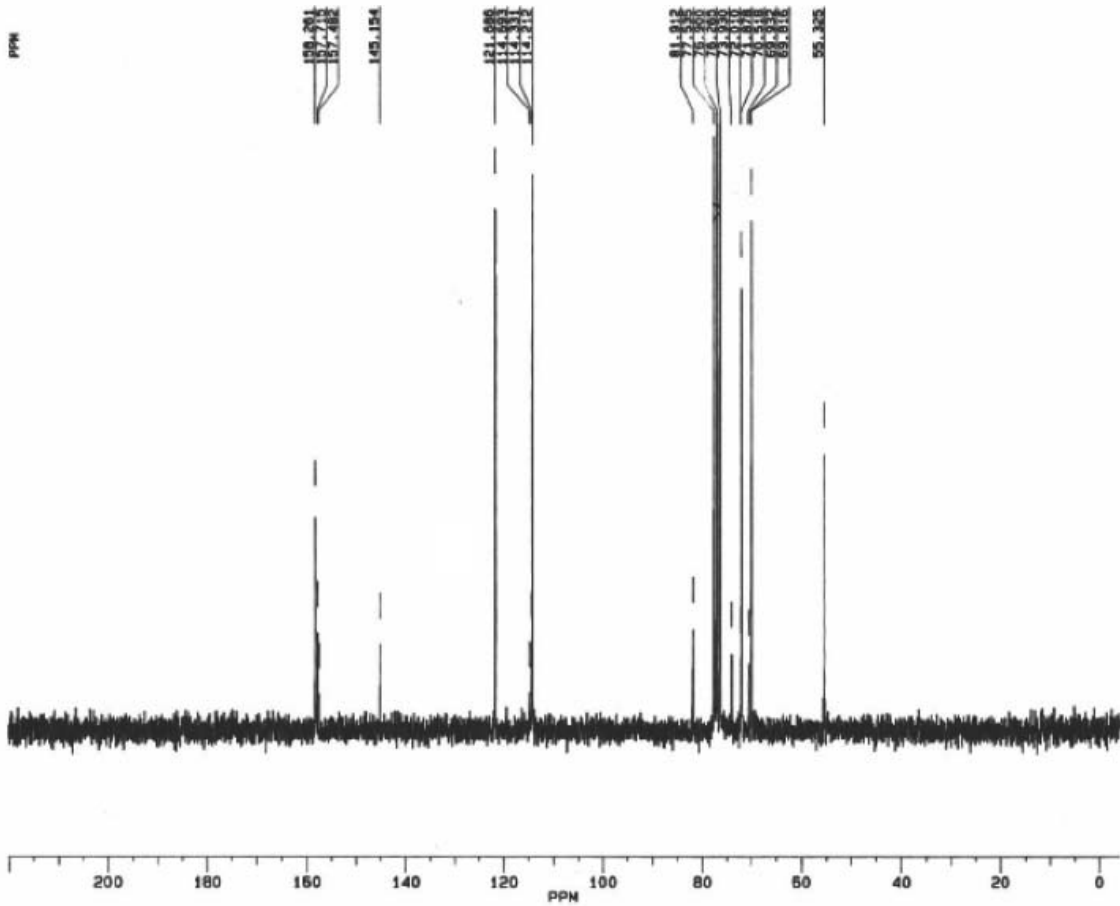



1b

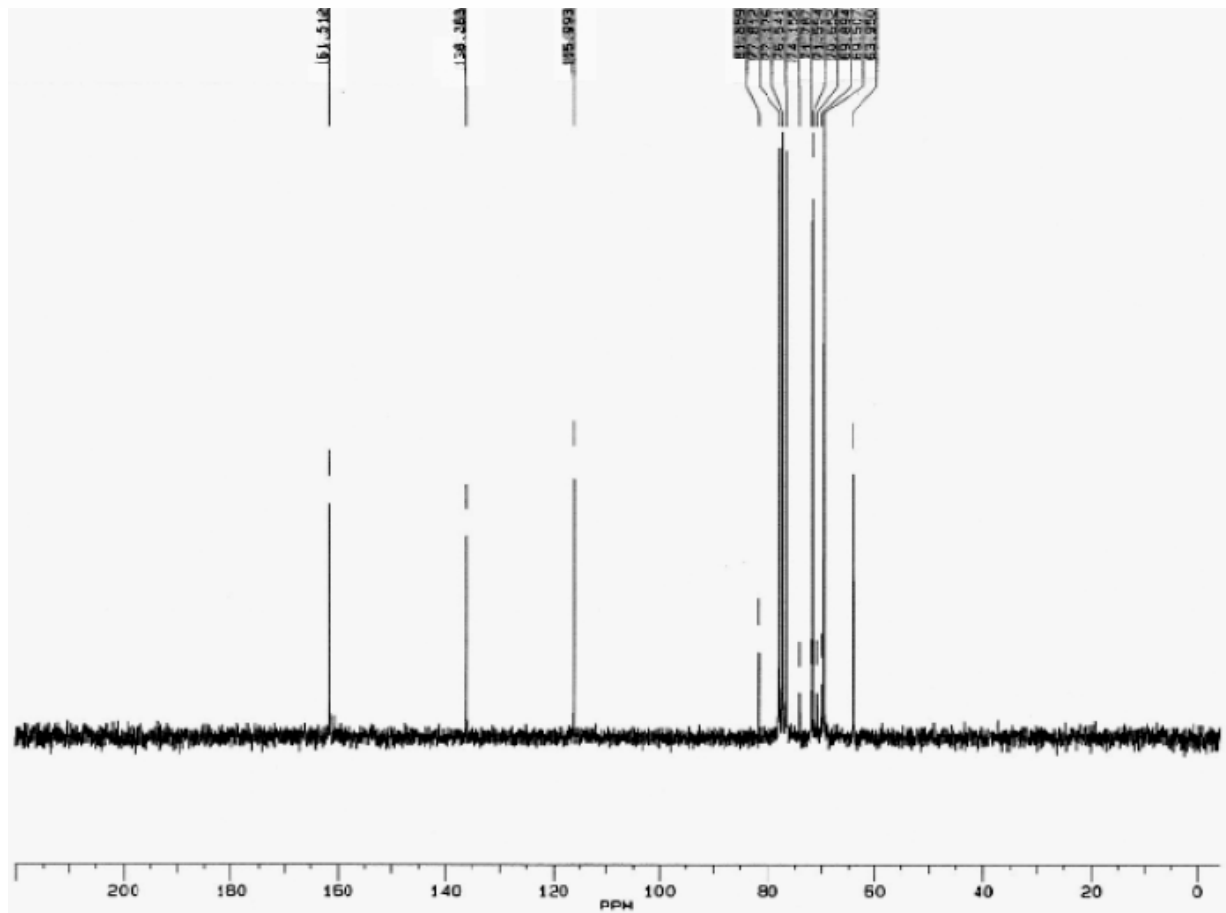

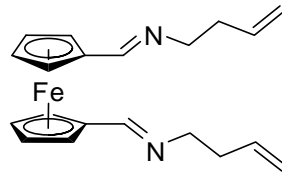

1c

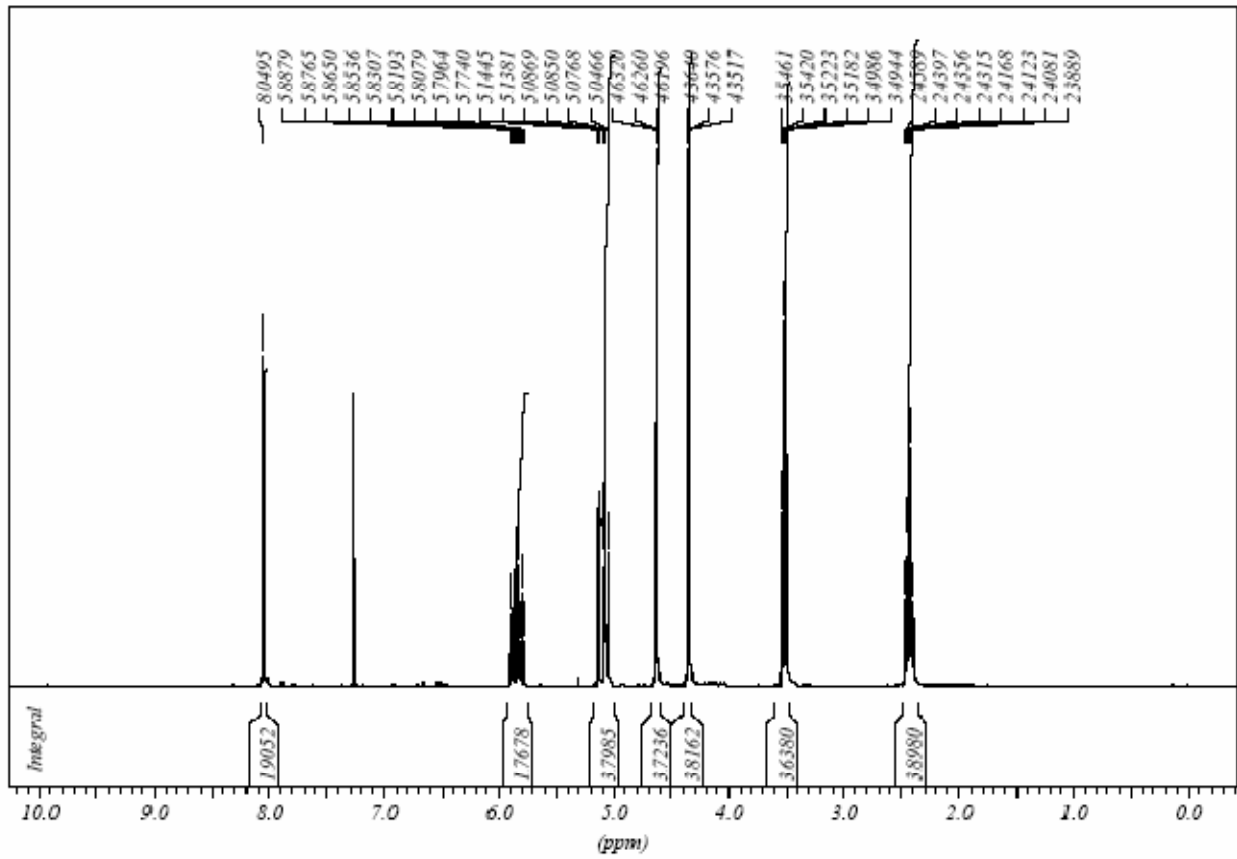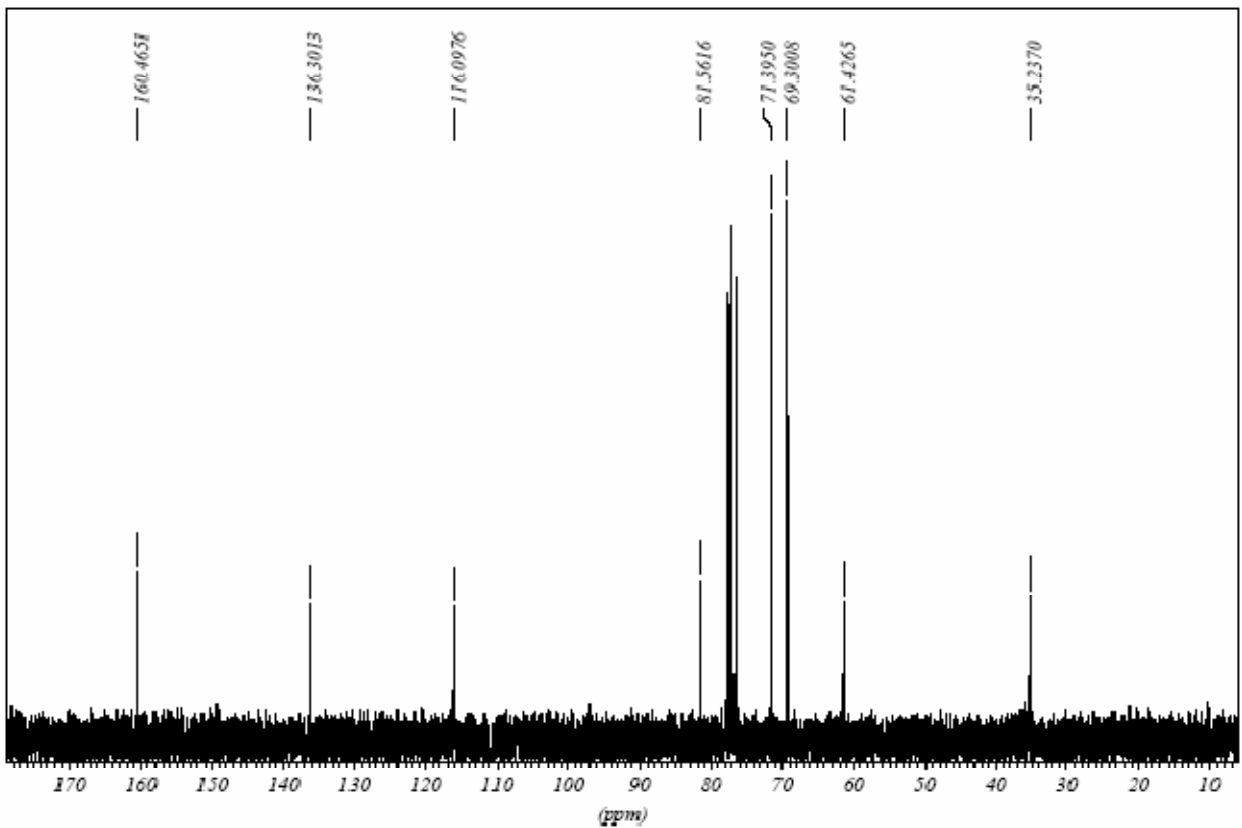

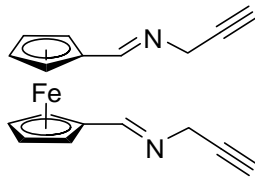

**1d**

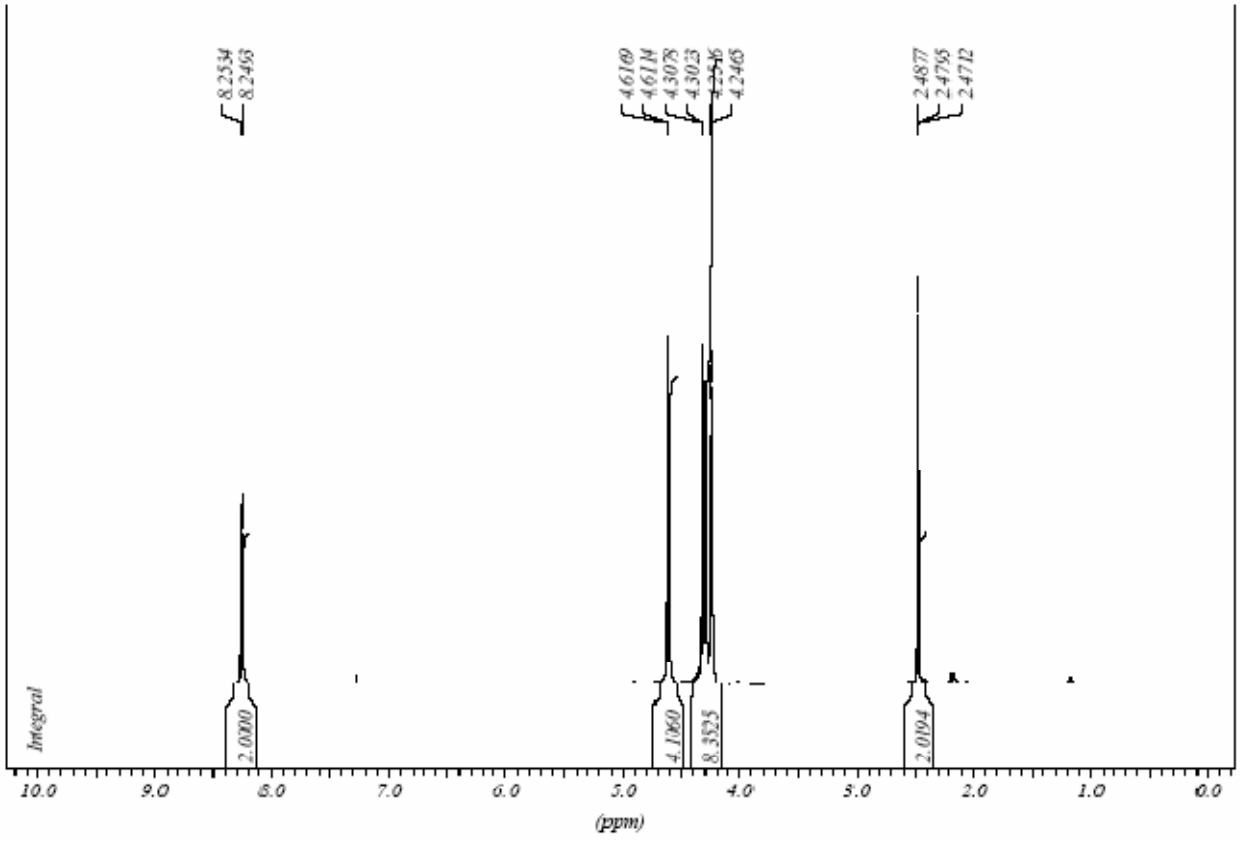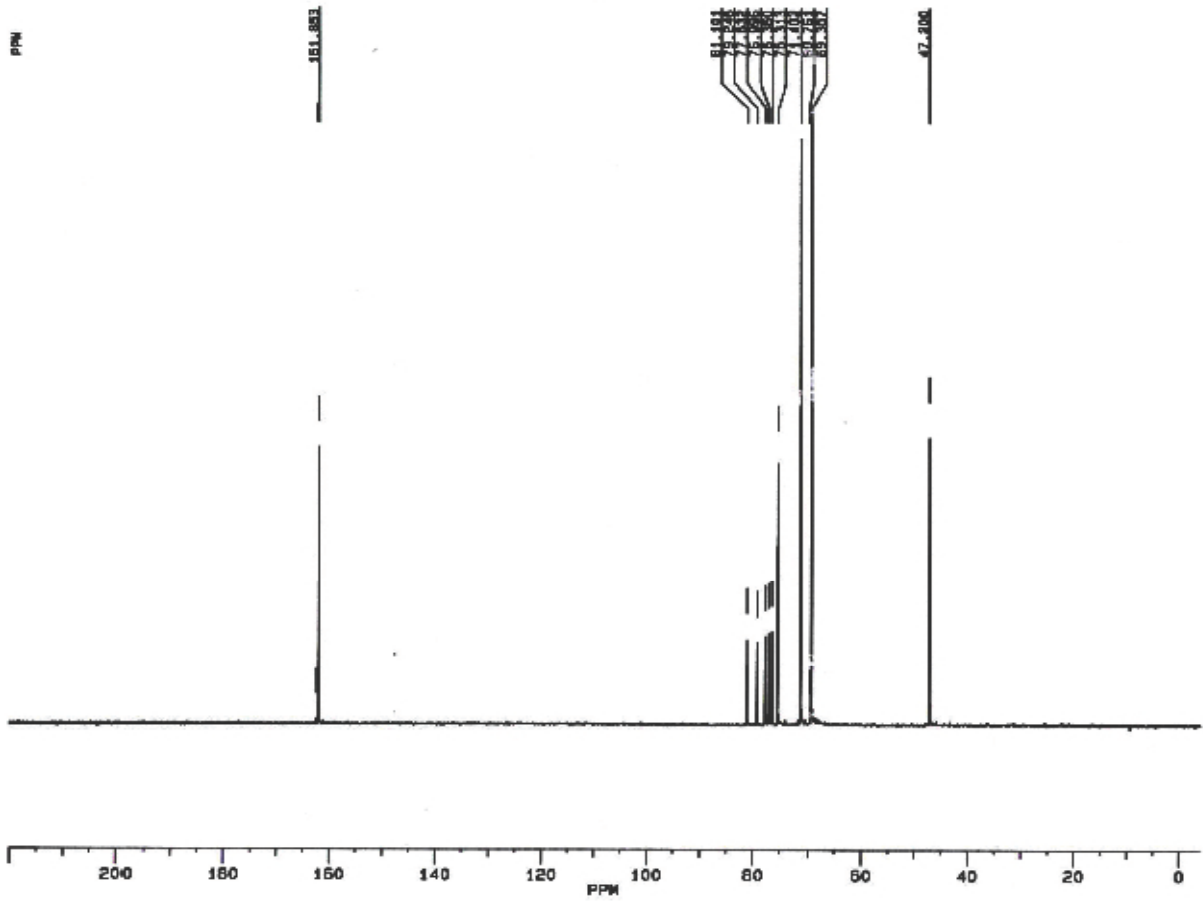





2b

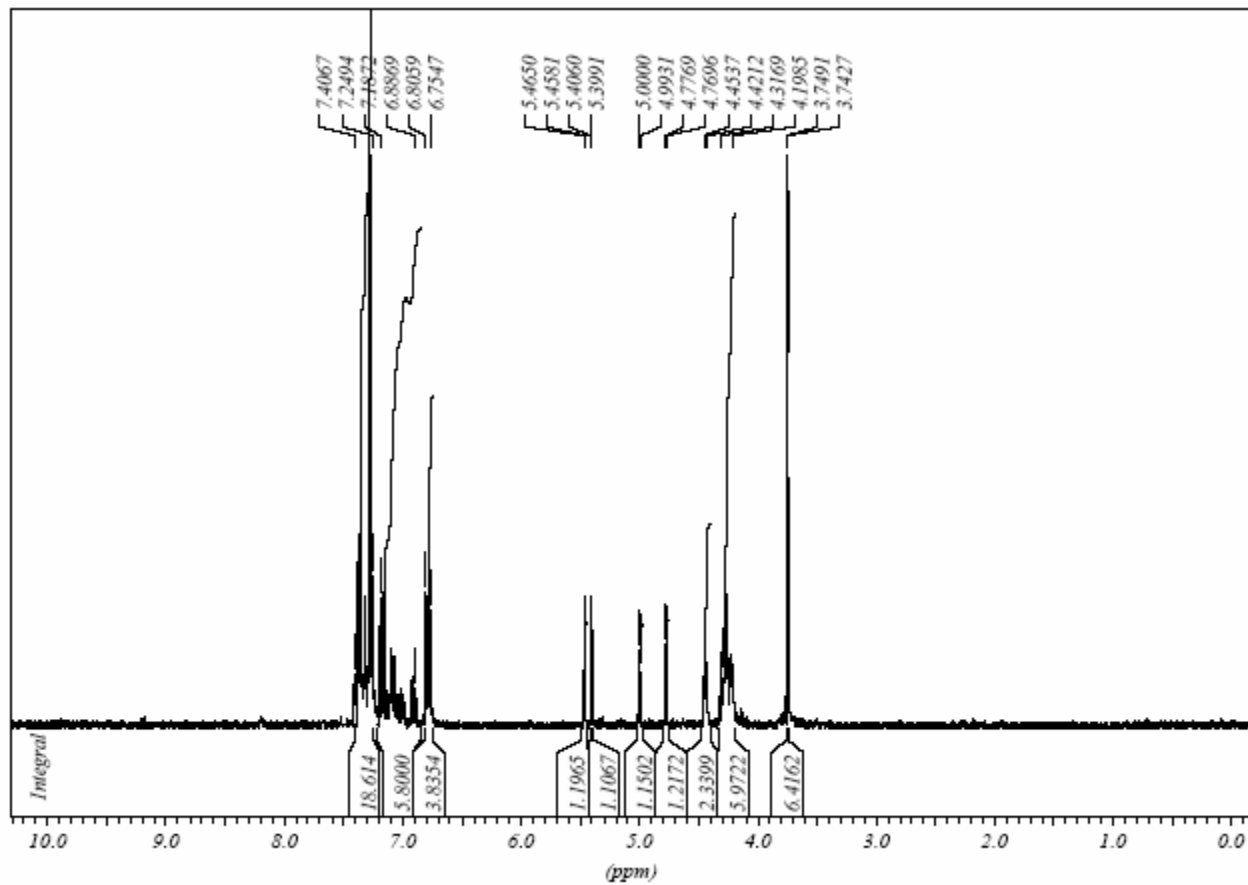



**syn-2c**



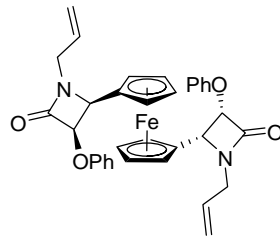

**anti-2c**

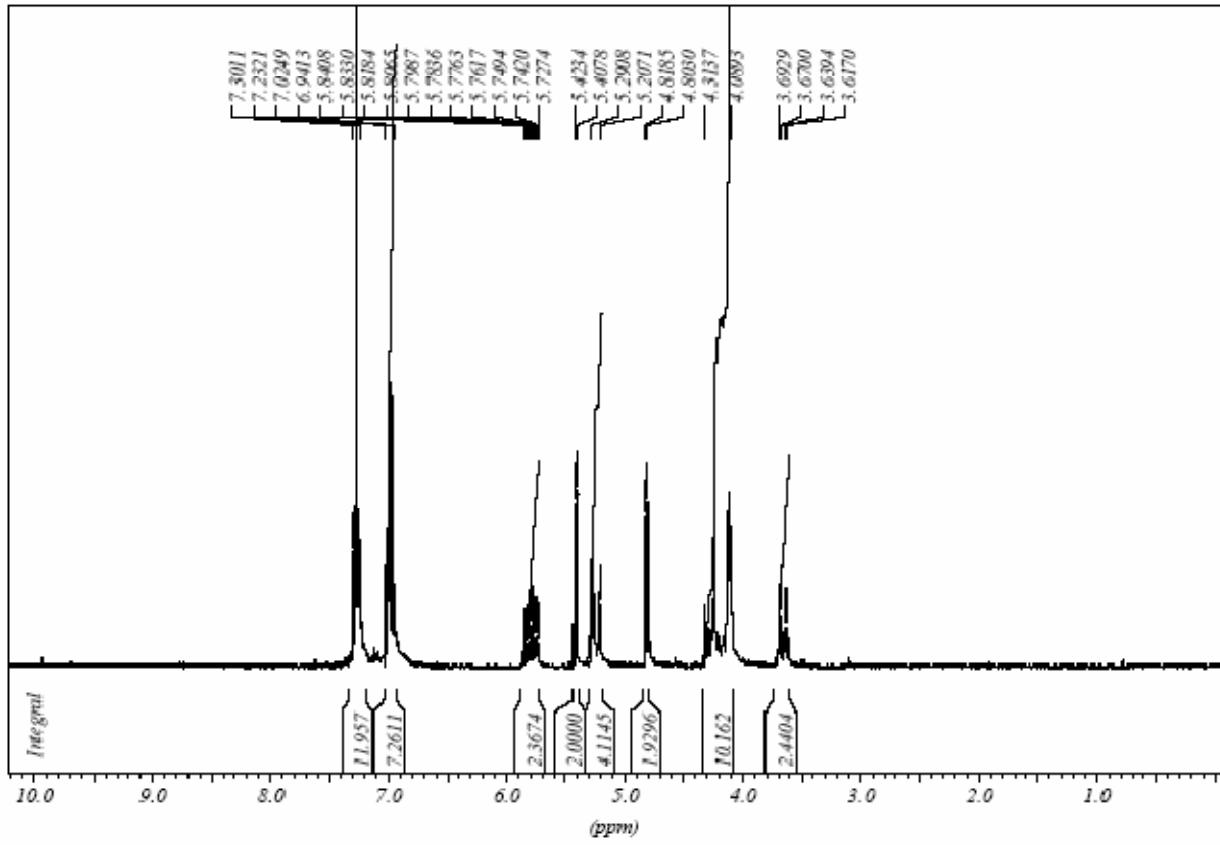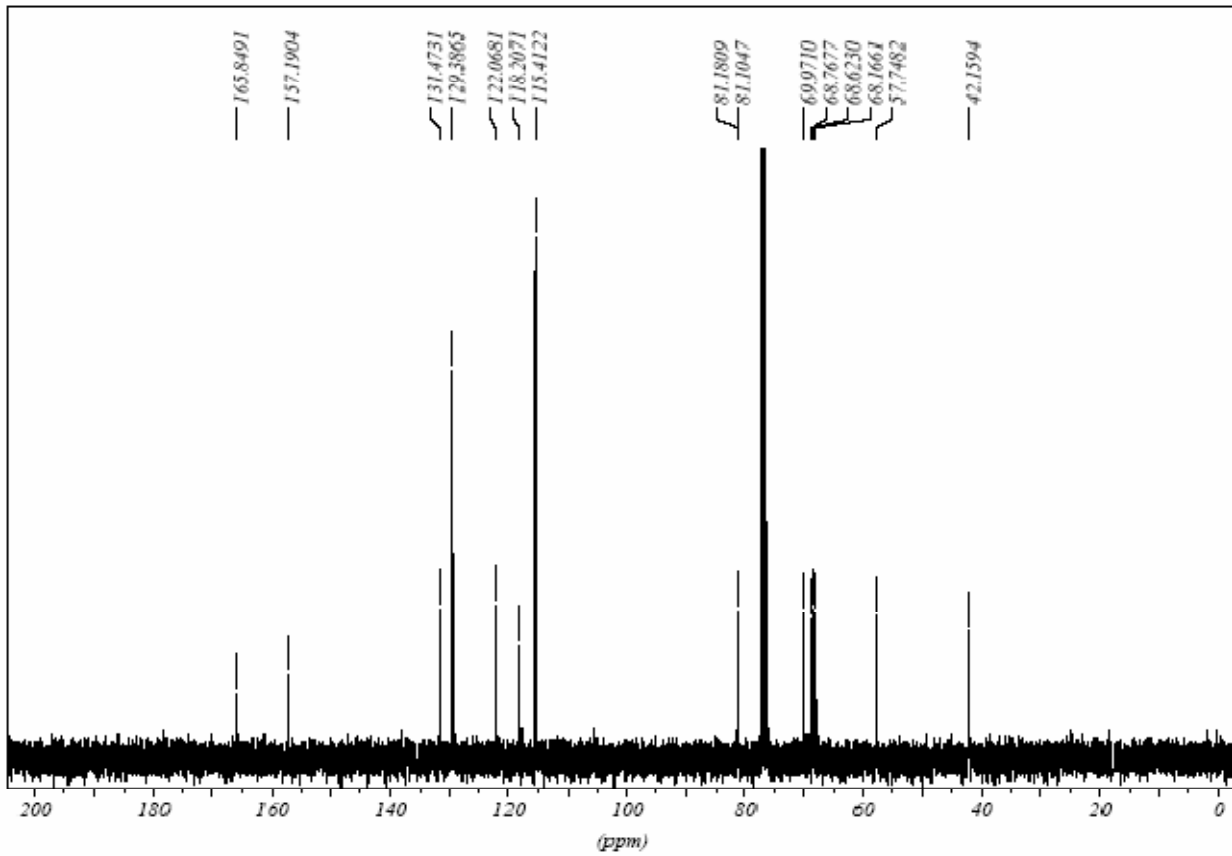



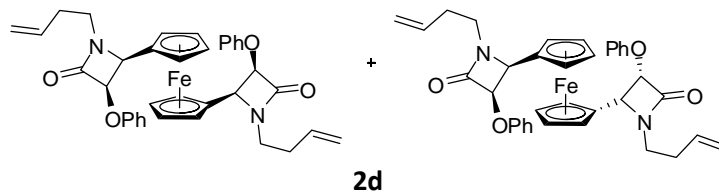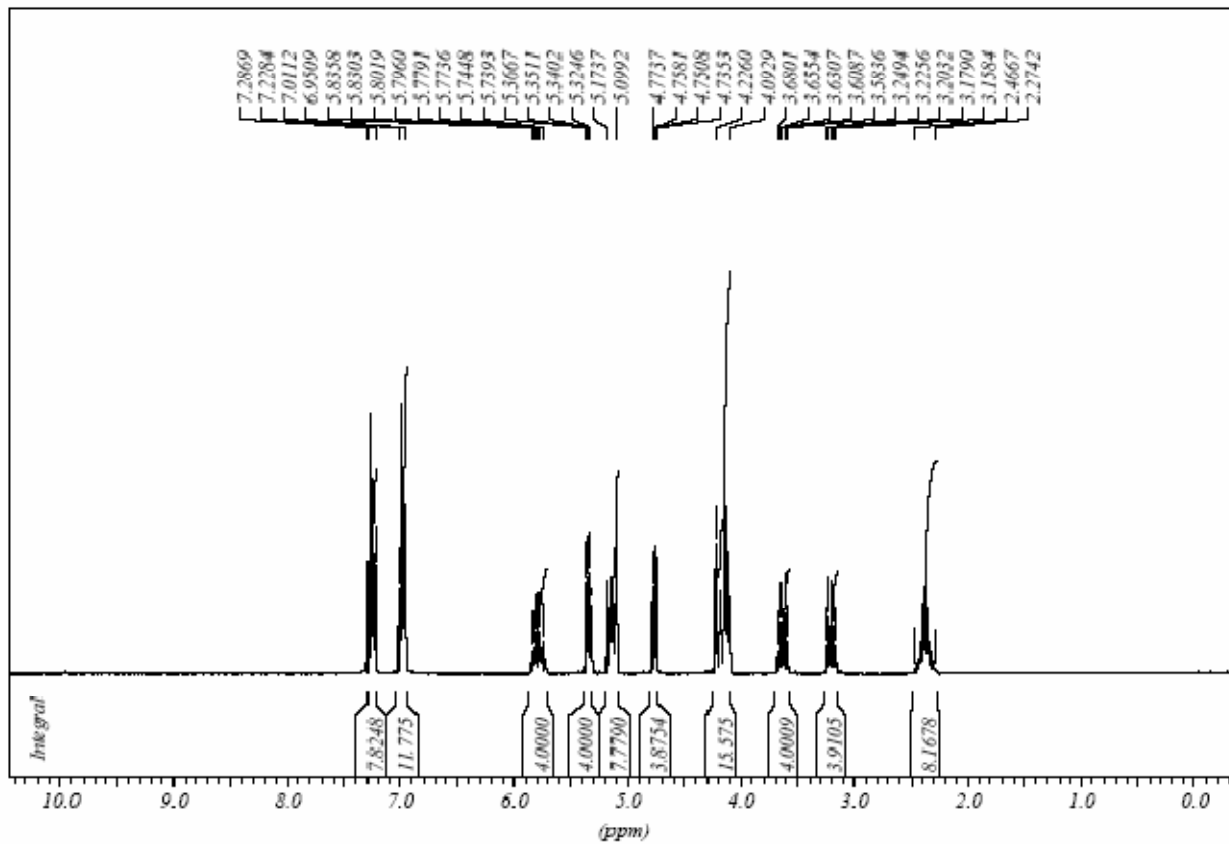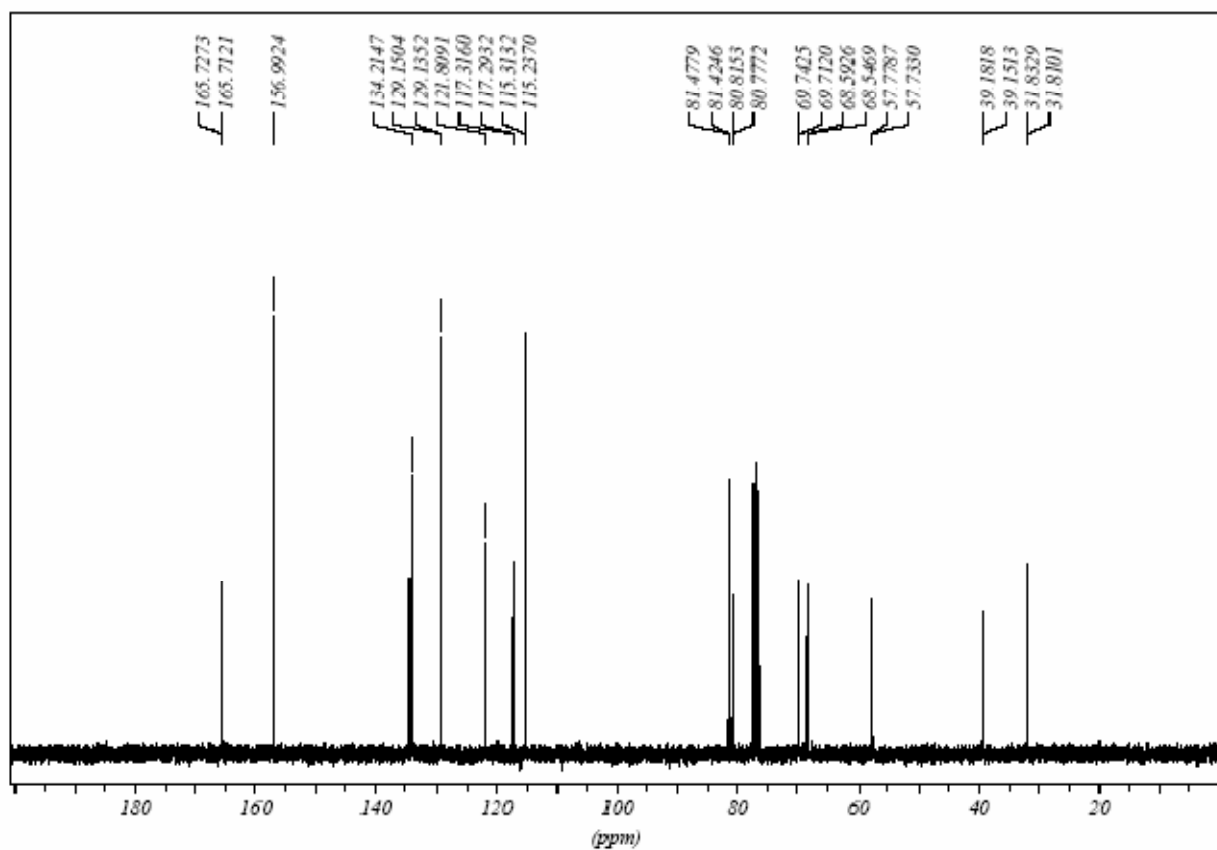



2e



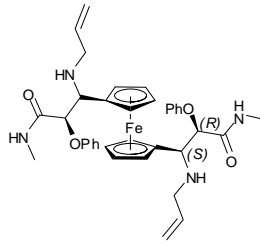

3a

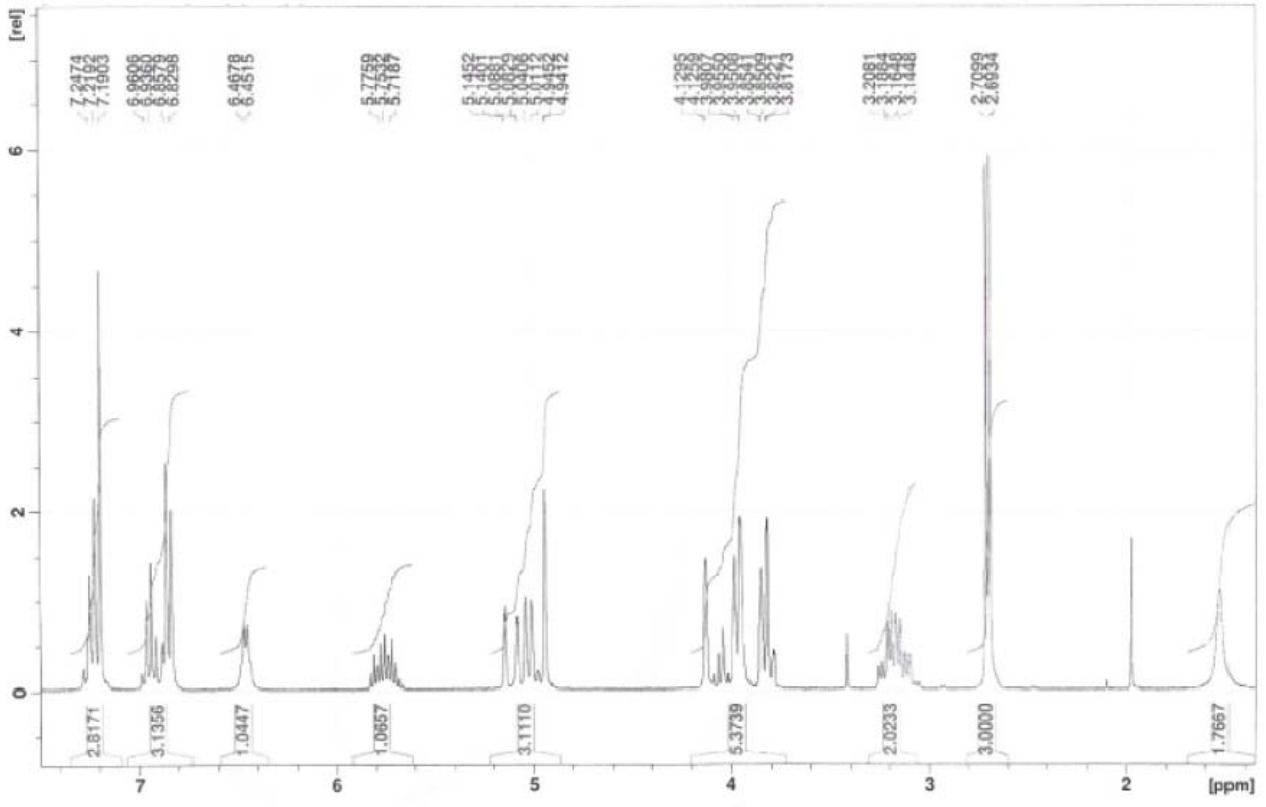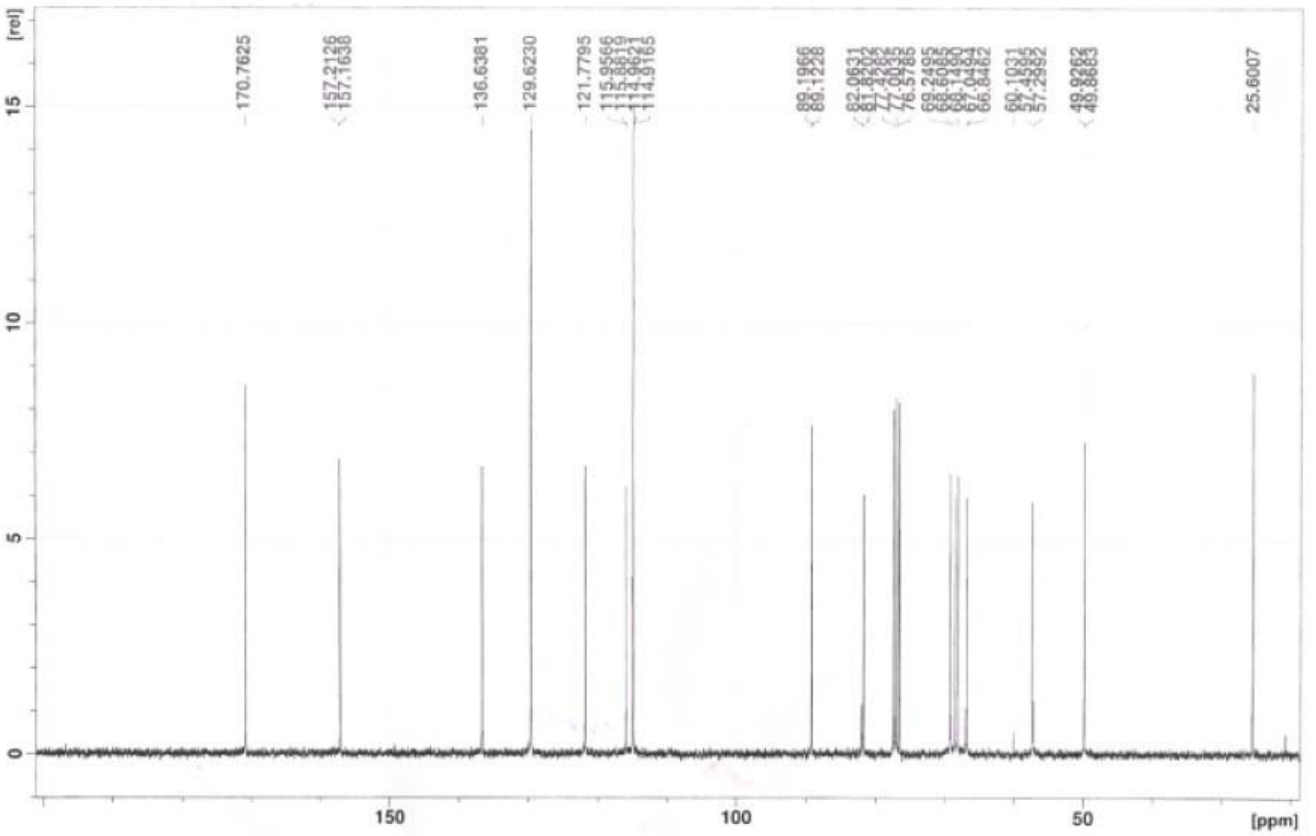

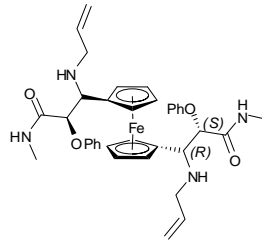

**3b**

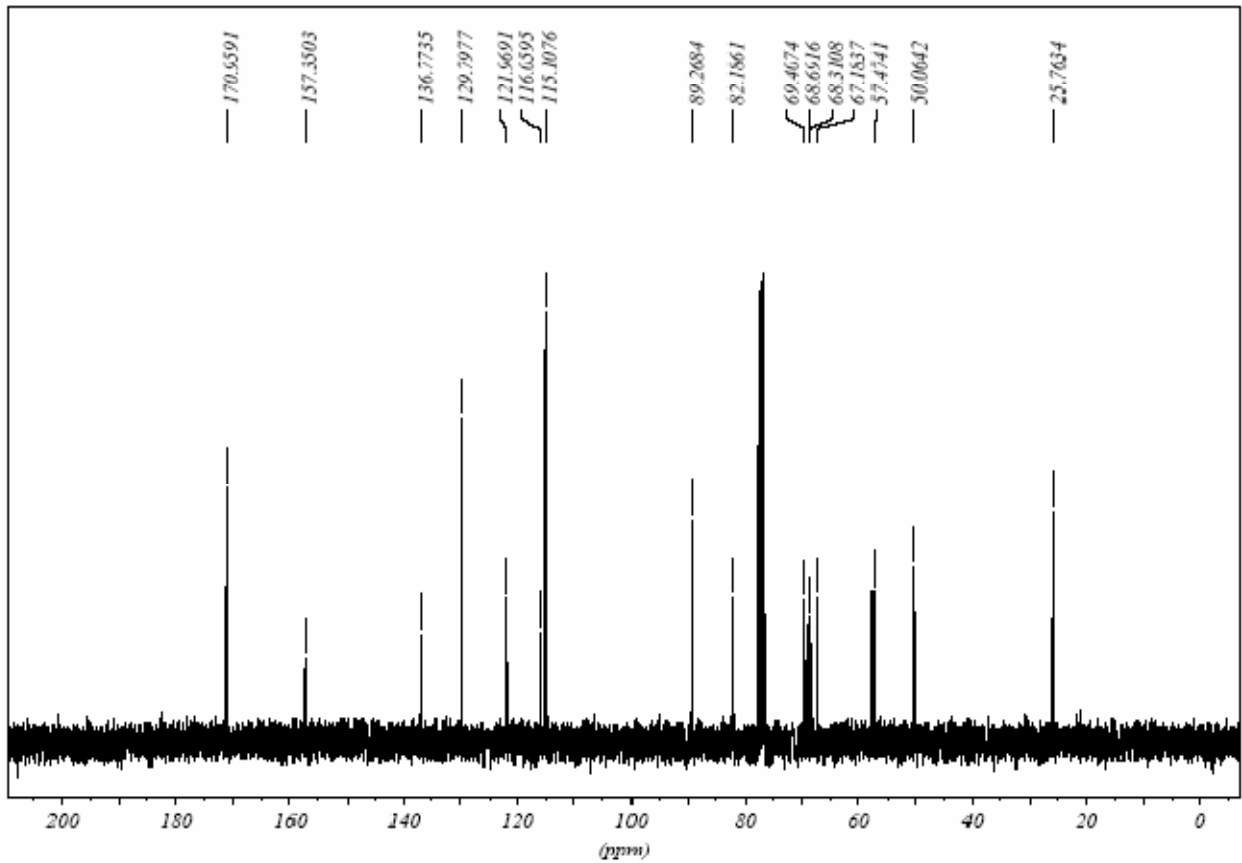



*syn-E-4*

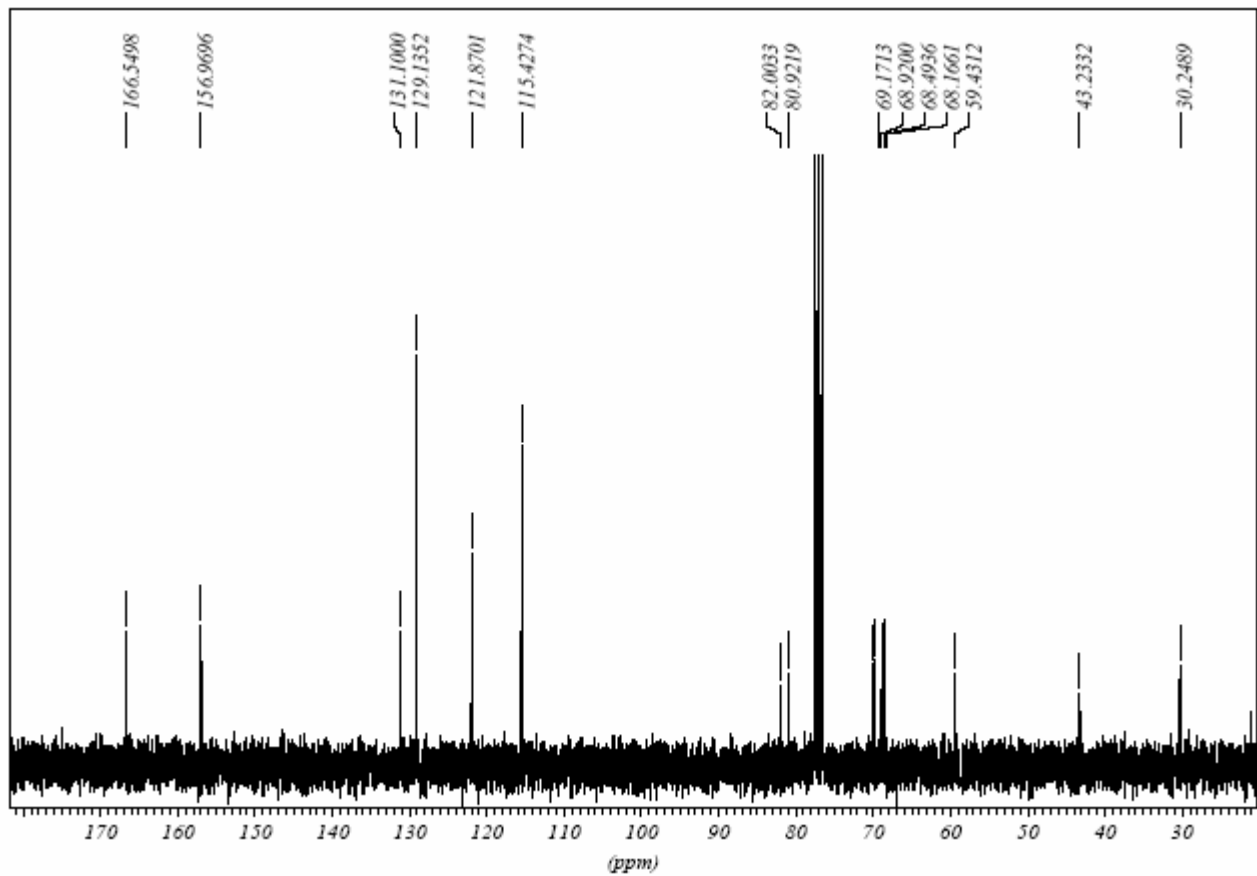

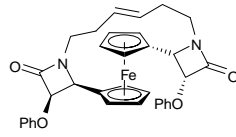

**anti-E-4**

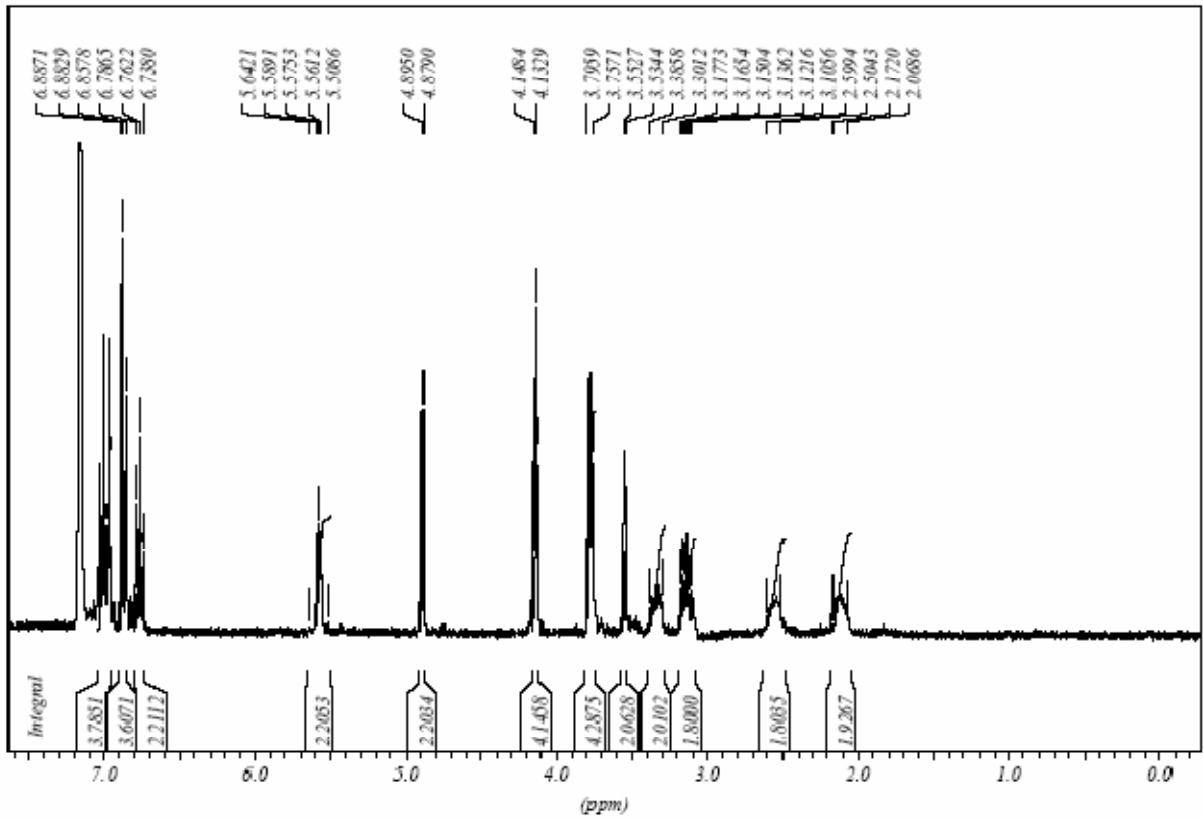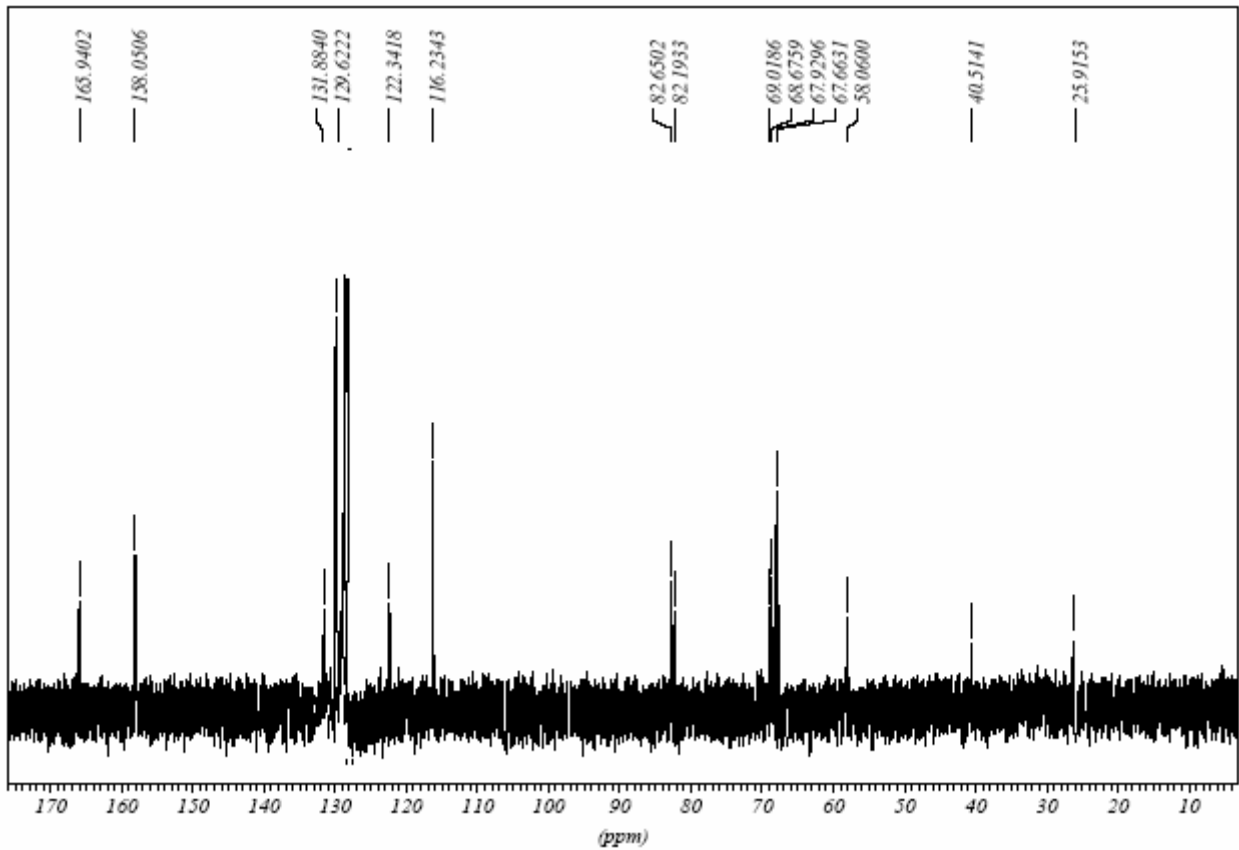



5



Supplement: b911450e.pdf [file b911450e.pdf]
